# Supplementary material for: Synthesis of the β-dipyrrinyl triphyrin(2.1.1) ligand and its coordination complexes
Source: Royal Society of Chemistry journal article supplement (doi:10.1039/d2dt00563h), 2022-01-01
Supplement: d2dt00563h1.pdf [file d2dt00563h1.pdf]

## Synthesis of $\beta$ -Dipyrrianyl Triphyrin(2.1.1) Ligand and Its Coordination Complexes

Gurpreet Kaur and Mangalampalli Ravikanth\*

Department of Chemistry, Indian Institute of Technology Bombay, Powai, Mumbai 400076,

India, E-mail: [ravikanth@chem.iitb.ac.in](mailto:ravikanth@chem.iitb.ac.in)

---

| Sr. no | Details                                                                                                                         | Page no. |
|--------|---------------------------------------------------------------------------------------------------------------------------------|----------|
| 1      | <b>Figures S1-S17.</b> Characterization (HRMS and NMR) data for all new compounds                                               | S2-S17   |
| 2      | <b>Figures S18-S19.</b> Absorption and Electrochemical spectra for compounds <b>5, 6, 7, 8</b> and <b>9</b>                     | S18-S19  |
| 3      | <b>Table S1-S5.</b> Cartesian coordinates of the optimized ( $S_0$ ) geometries of the compounds <b>5, 6, 7, 8</b> and <b>9</b> | S20-S28  |
| 4      | <b>Table S6.</b> Comparison of energy levels using B3LYP/LANL2DZ and def2-TZVP basis sets.                                      | S28      |

## DEPARTMENT OF CHEMISTRY, I.I.T.(B)

## Analysis Info

Analysis Name D:\Data\AUG 2021\MR-GP-TRI-CHO.d  
 Method NaICSI\_pos\_1000-a.m  
 Sample Name MR-GP-TRI-CHO  
 Comment C51H39N3O

Acquisition Date 8/3/2021 9:02:37 PM  
 Operator KPK-IN  
 Instrument maXis impact 282001.00081

## Acquisition Parameter

|             |            |                      |          |                  |           |
|-------------|------------|----------------------|----------|------------------|-----------|
| Source Type | ESI        | Ion Polarity         | Positive | Set Nebulizer    | 0.3 Bar   |
| Focus       | Not active | Set Capillary        | 3700 V   | Set Dry Heater   | 180 °C    |
| Scan Begin  | 50 m/z     | Set End Plate Offset | -500 V   | Set Dry Gas      | 4.0 l/min |
| Scan End    | 1000 m/z   | Set Charging Voltage | 2000 V   | Set Divert Valve | Source    |
|             |            | Set Corona           | 0 nA     | Set APCI Heater  | 0 °C      |

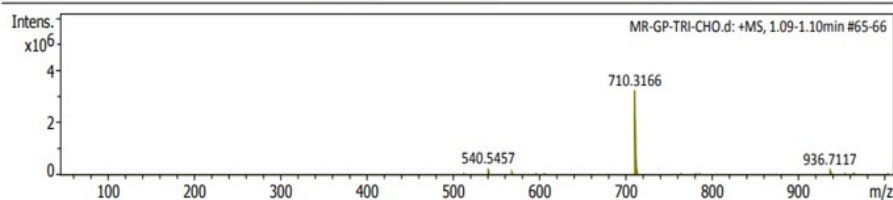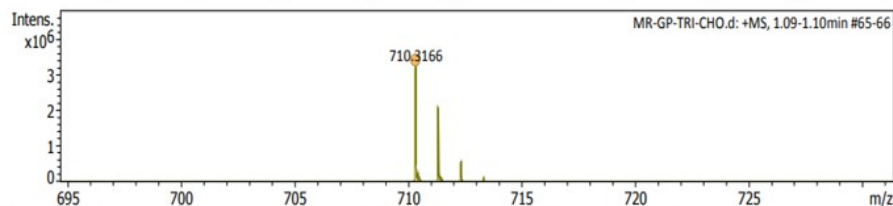

| Meas. m/z | # | Ion Formula                                      | m/z      | err [ppm] | mSigma | # mSigma | Score  | rdb  | e <sup>-</sup> Conf | N-Rule |
|-----------|---|--------------------------------------------------|----------|-----------|--------|----------|--------|------|---------------------|--------|
| 710.3166  | 1 | C <sub>51</sub> H <sub>40</sub> N <sub>3</sub> O | 710.3166 | -0.0      | 41.0   | 1        | 100.00 | 34.0 | even                | ok     |

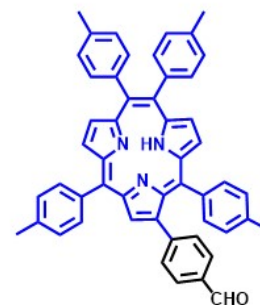

Chemical Formula: C<sub>51</sub>H<sub>39</sub>N<sub>3</sub>O  
 Exact Mass: 709.3093  
 Observed Mass: 710.3166 [M+H]<sup>+</sup>

Figure S1. HR mass spectrum of the compound 3.

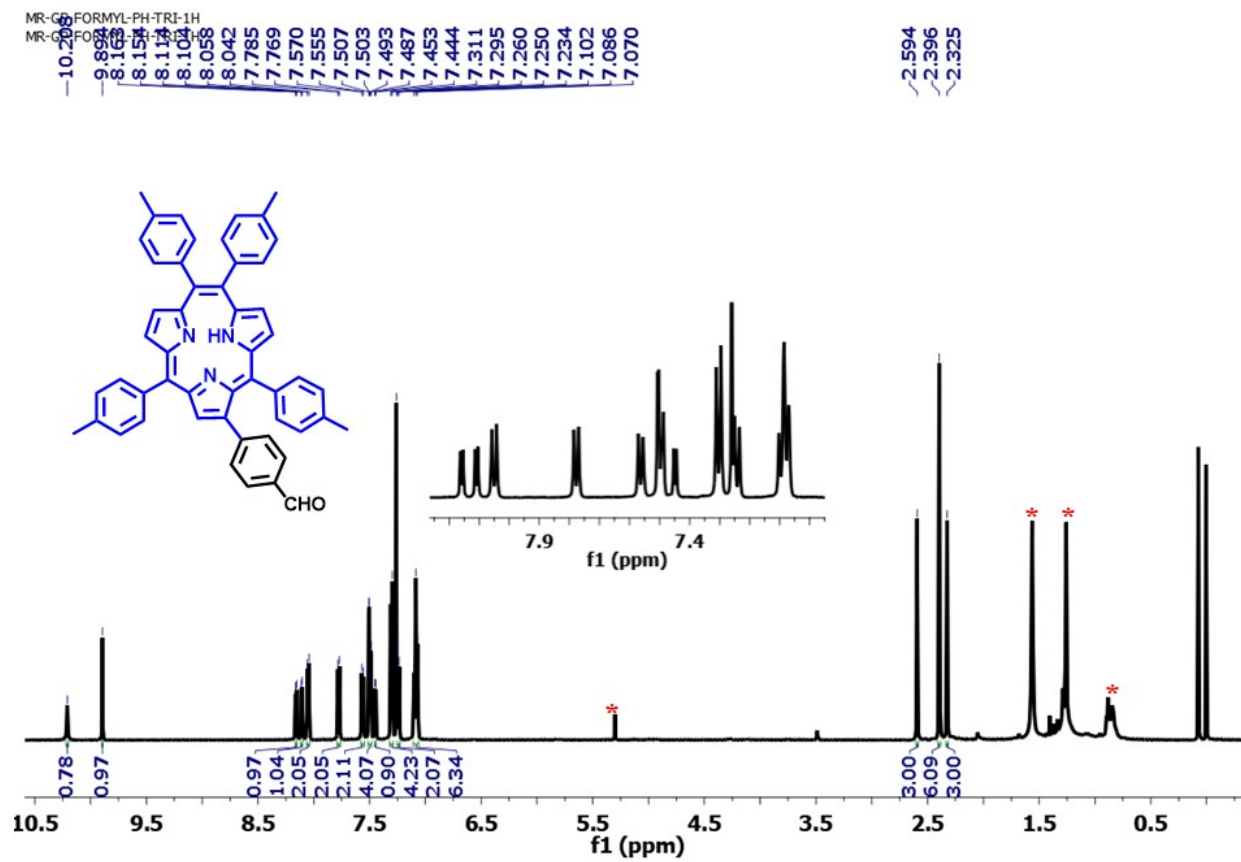

**Figure S2.**  $^1\text{H}$  NMR spectrum of the compound **3** recorded in  $\text{CDCl}_3$  in 400 MHz instrument.  
Note: Peaks marked with asterisk (\*) are due to residual solvents.

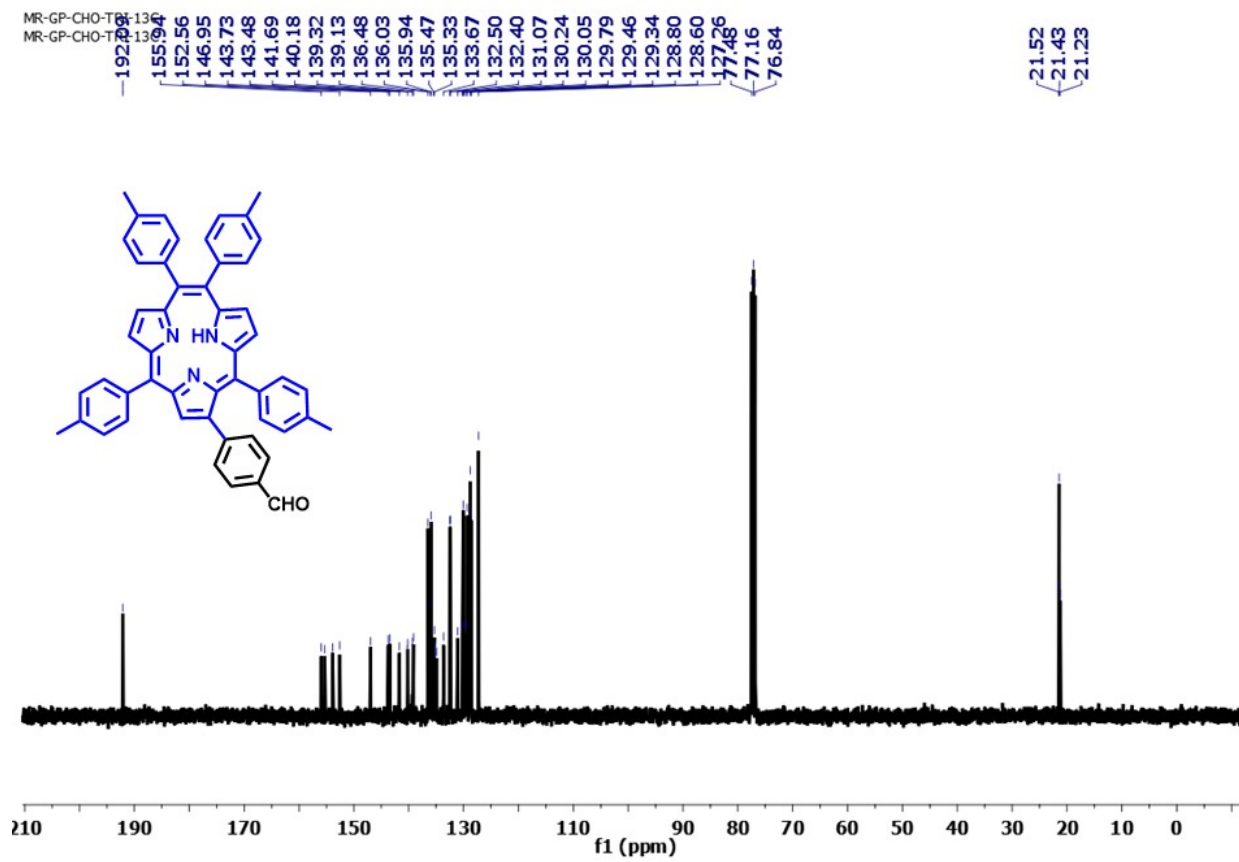

**Figure S3.** <sup>13</sup>C NMR spectrum of the compound **3** recorded in CDCl<sub>3</sub> in 101MHz instrument.

## DEPARTMENT OF CHEMISTRY, I.I.T.(B)

**Analysis Info** Acquisition Date 9/28/2021 8:25:34 PM  
 Analysis Name D:\Data\SEP 21\MR-GP-DPM-111.d  
 Method NaICSI\_pos\_1500.m Operator CMRV OUT  
 Sample Name MR-GP-DPM-111 Instrument maXis impact 282001.00081  
 Comment C59H47N5

**Acquisition Parameter**

|             |            |                      |          |                  |           |
|-------------|------------|----------------------|----------|------------------|-----------|
| Source Type | ESI        | Ion Polarity         | Positive | Set Nebulizer    | 0.3 Bar   |
| Focus       | Not active | Set Capillary        | 3700 V   | Set Dry Heater   | 180 °C    |
| Scan Begin  | 50 m/z     | Set End Plate Offset | -500 V   | Set Dry Gas      | 4.0 l/min |
| Scan End    | 1500 m/z   | Set Charging Voltage | 2000 V   | Set Divert Valve | Source    |
|             |            | Set Corona           | 0 nA     | Set APCI Heater  | 0 °C      |

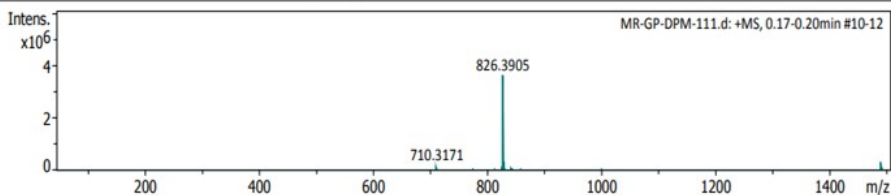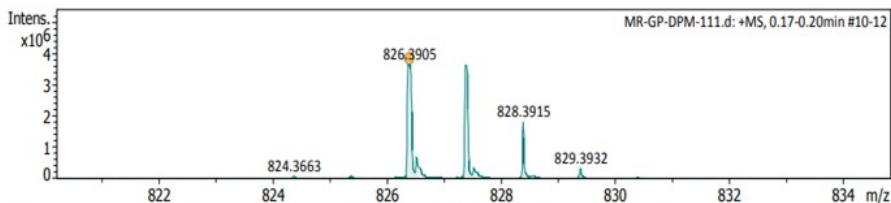

| Meas. m/z | # | Ion Formula                                    | m/z      | err [ppm] | mSigma | # mSigma | Score  | rdb  | e <sup>-</sup> Conf | N-Rule |
|-----------|---|------------------------------------------------|----------|-----------|--------|----------|--------|------|---------------------|--------|
| 826.3905  | 1 | C <sub>59</sub> H <sub>48</sub> N <sub>5</sub> | 826.3904 | -0.1      | 220.2  | 1        | 100.00 | 39.0 | even                | ok     |

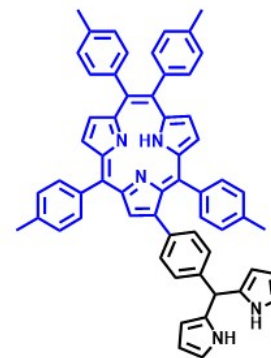

**Chemical Formula:** C<sub>59</sub>H<sub>47</sub>N<sub>5</sub>  
**Exact Mass:** 825.3831  
**Observed Mass:** 826.3905 [M+H]<sup>+</sup>

**Figure S4.** HR mass spectrum of the compound 4.

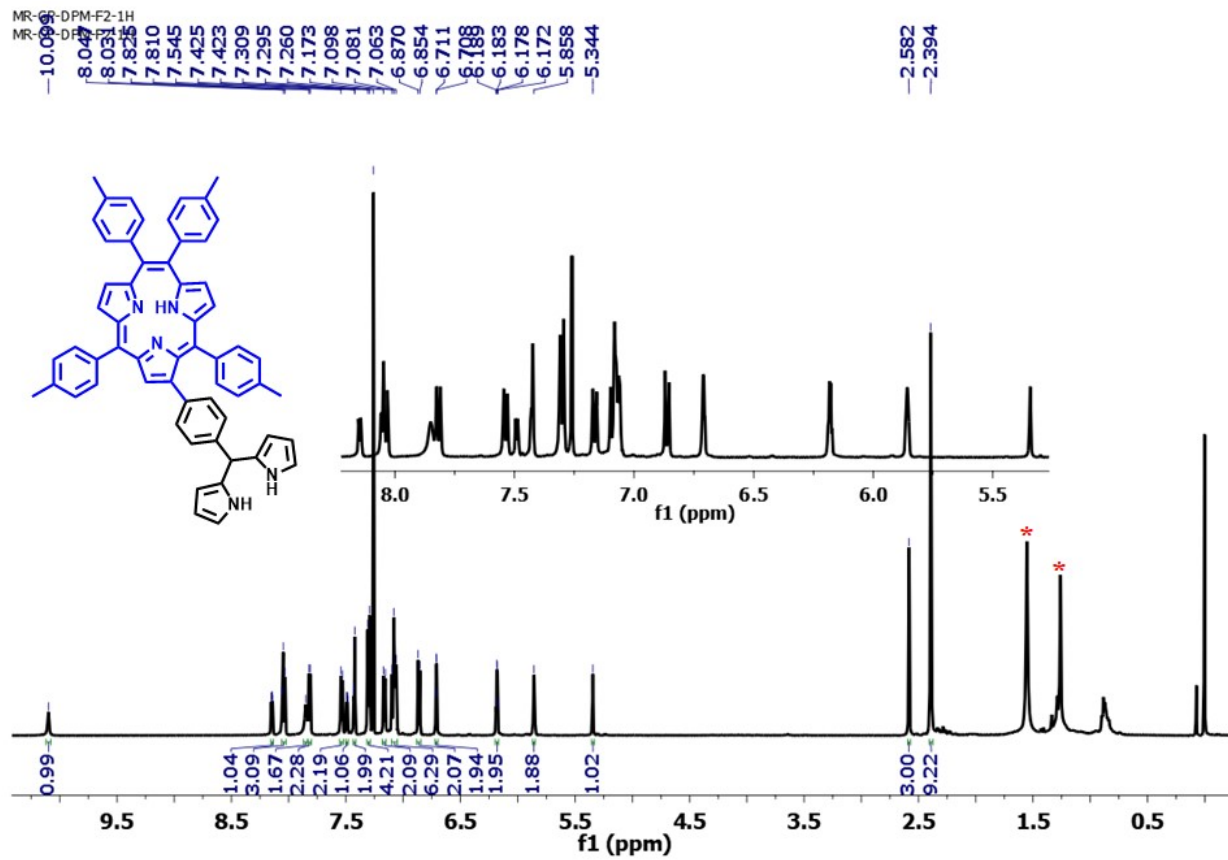

**Figure S5.**  $^1\text{H}$  NMR spectrum of the compound **4** recorded in  $\text{CDCl}_3$  in 400 MHz instrument.  
Note: Peaks marked with asterisk (\*) are due to residual solvents.

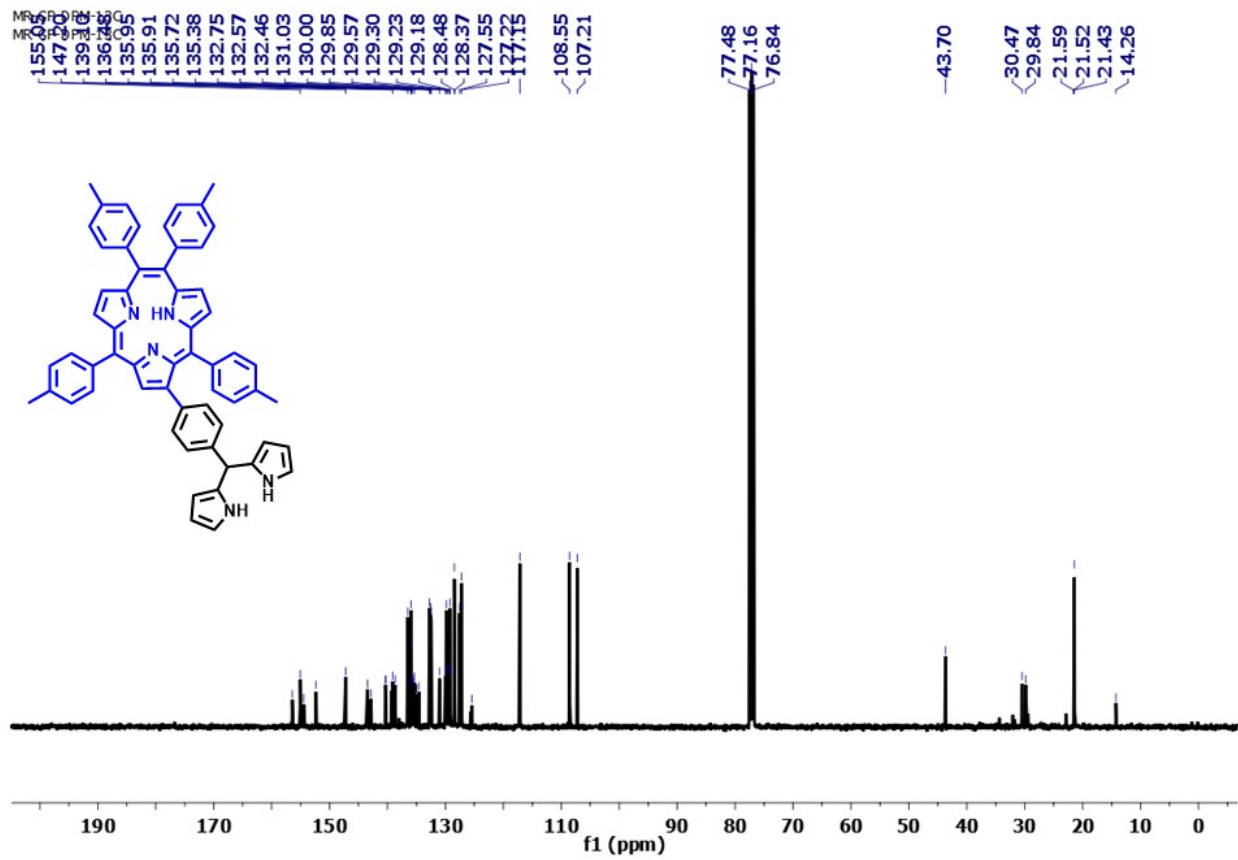

**Figure S6.** <sup>13</sup>C NMR spectrum of the compound 4 recorded in CDCl<sub>3</sub> in 101 MHz instrument.

## DEPARTMENT OF CHEMISTRY, I.I.T.(B)

**Analysis Info**  
 Analysis Name D:\Data\OCT 21\MR-GP-DIPY.d Acquisition Date 10/5/2021 8:20:21 PM  
 Method NaICsl\_pos\_1500a.m Operator GKL-OUT  
 Sample Name MR-GP-DIPY Instrument maXis impact 282001.00081  
 Comment C59H45N5

**Acquisition Parameter**

|             |            |                      |          |                  |           |
|-------------|------------|----------------------|----------|------------------|-----------|
| Source Type | ESI        | Ion Polarity         | Positive | Set Nebulizer    | 0.4 Bar   |
| Focus       | Not active | Set Capillary        | 3700 V   | Set Dry Heater   | 180 °C    |
| Scan Begin  | 50 m/z     | Set End Plate Offset | -500 V   | Set Dry Gas      | 4.0 l/min |
| Scan End    | 1500 m/z   | Set Charging Voltage | 2000 V   | Set Divert Valve | Source    |
|             |            | Set Corona           | 0 nA     | Set APCI Heater  | 0 °C      |

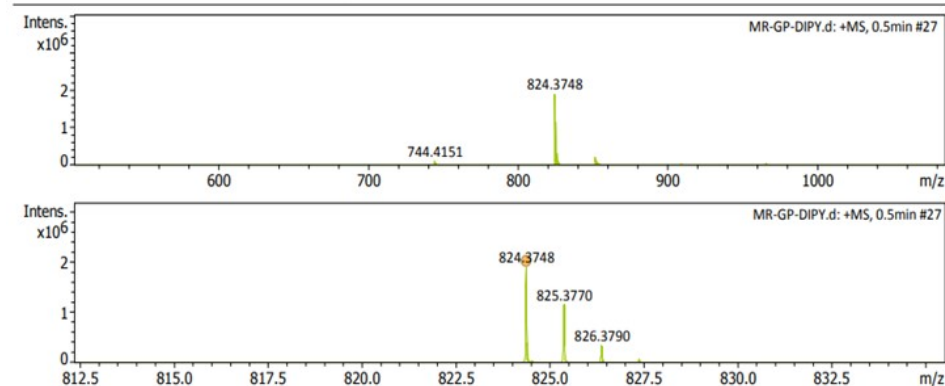

| Meas. m/z | # | Ion Formula                                    | m/z      | err [ppm] | mSigma | # mSigma | Score  | rdb  | e <sup>-</sup> Conf | N-Rule |
|-----------|---|------------------------------------------------|----------|-----------|--------|----------|--------|------|---------------------|--------|
| 824.3748  | 1 | C <sub>59</sub> H <sub>46</sub> N <sub>5</sub> | 824.3748 | -0.1      | 34.7   | 1        | 100.00 | 40.0 | even                | ok     |

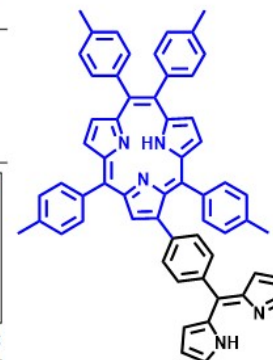

**Chemical Formula:** C<sub>59</sub>H<sub>45</sub>N<sub>5</sub>  
**Exact Mass:** 823.3675  
**Observed Mass:** 824. [M+H]<sup>+</sup>

**Figure S7.** HR mass spectrum of the compound 5.



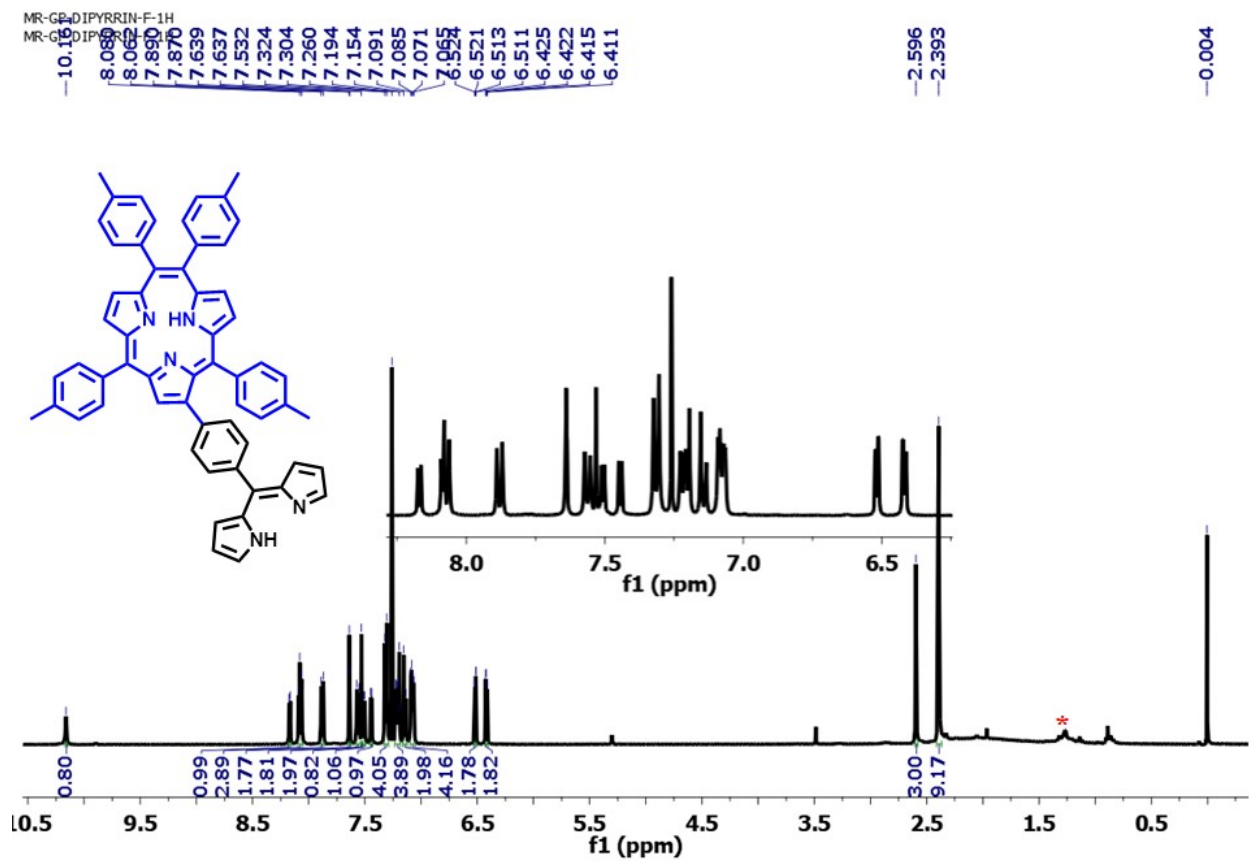

**Figure S8.**  $^1\text{H}$  NMR spectrum of the compound **5** recorded in  $\text{CDCl}_3$  in 400 MHz instrument.  
Note: Peaks marked with asterisk (\*) are due to residual solvents.

## DEPARTMENT OF CHEMISTRY, I.I.T.(B)

## Analysis Info

Analysis Name D:\Data\SEP 21\MR-GP-BF2-11112.d  
 Method NaICSI\_pos\_1500.m  
 Sample Name MR-GP-BF2-11112  
 Comment C59H45BF2N5

Acquisition Date 9/16/2021 7:25:46 PM

Operator SJG-IN  
 Instrument maXis impact 282001.00081

## Acquisition Parameter

|             |            |                      |          |                  |           |
|-------------|------------|----------------------|----------|------------------|-----------|
| Source Type | ESI        | Ion Polarity         | Positive | Set Nebulizer    | 0.3 Bar   |
| Focus       | Not active | Set Capillary        | 3700 V   | Set Dry Heater   | 180 °C    |
| Scan Begin  | 50 m/z     | Set End Plate Offset | -500 V   | Set Dry Gas      | 4.0 l/min |
| Scan End    | 1500 m/z   | Set Charging Voltage | 2000 V   | Set Divert Valve | Source    |
|             |            | Set Corona           | 0 nA     | Set APCI Heater  | 0 °C      |

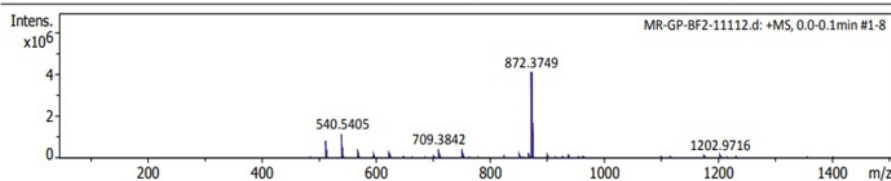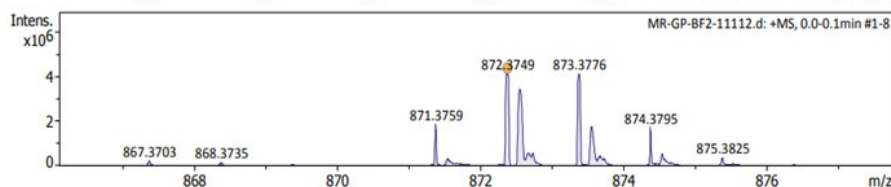

| Meas. m/z | # | Ion Formula | m/z      | err [ppm] | mSigma | # mSigma | Score  | rdb  | e <sup>-</sup> Conf | N-Rule |
|-----------|---|-------------|----------|-----------|--------|----------|--------|------|---------------------|--------|
| 872.3749  | 1 | C59H45BF2N5 | 872.3731 | -1.0      | 223.0  | 1        | 100.00 | 40.0 | even                | ok     |

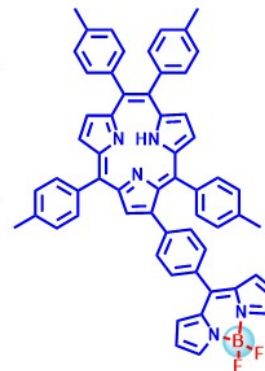

Chemical Formula: C<sub>59</sub>H<sub>44</sub>BF<sub>2</sub>N<sub>5</sub>  
 Exact Mass: 871.3658  
 Observed Mass: 872.3749 [M+H]<sup>+</sup>

Figure S9. HR mass spectrum of the compound 6.

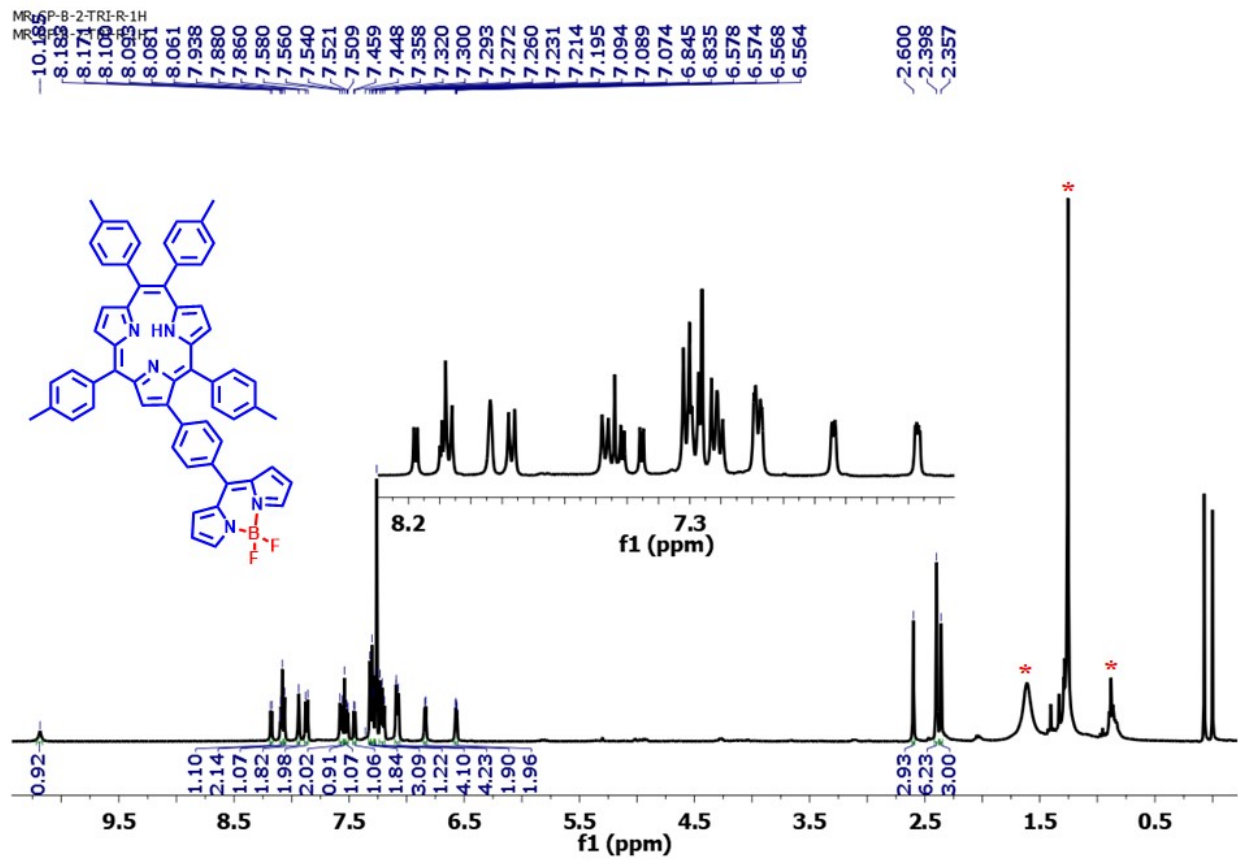

**Figure S10.**  $^1\text{H}$  NMR spectrum of the compound **6** recorded in  $\text{CDCl}_3$  in 400 MHz instrument.  
Note: Peaks marked with asterisk (\*) are due to residual solvents.

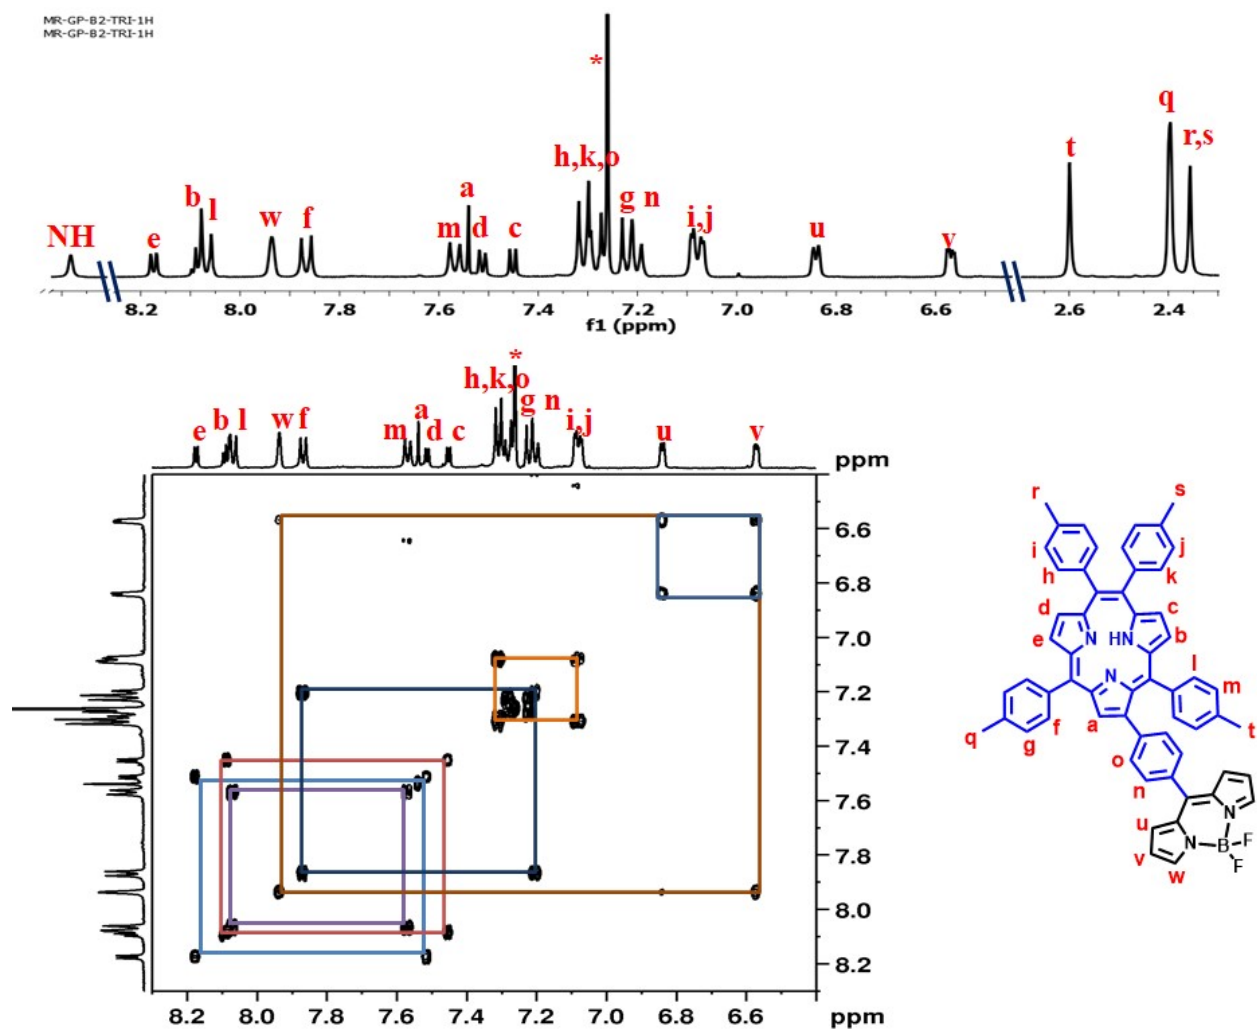

Figure S11.  $^1\text{H}$ - $^1\text{H}$  COSY of Compound **6** recorded in  $\text{CDCl}_3$ .

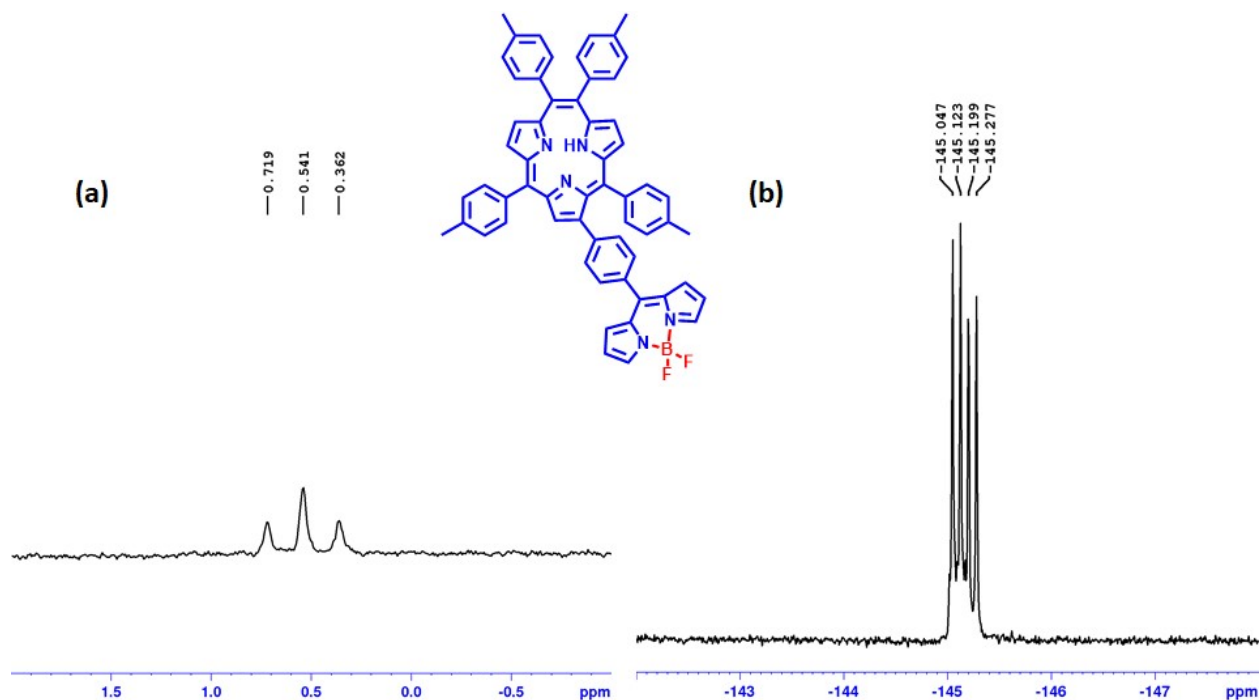

Figure. S12.  $^{11}\text{B}$  NMR spectrum (a) and  $^{19}\text{F}$  spectrum (b) of the compound 6 recorded in  $\text{CDCl}_3$ .

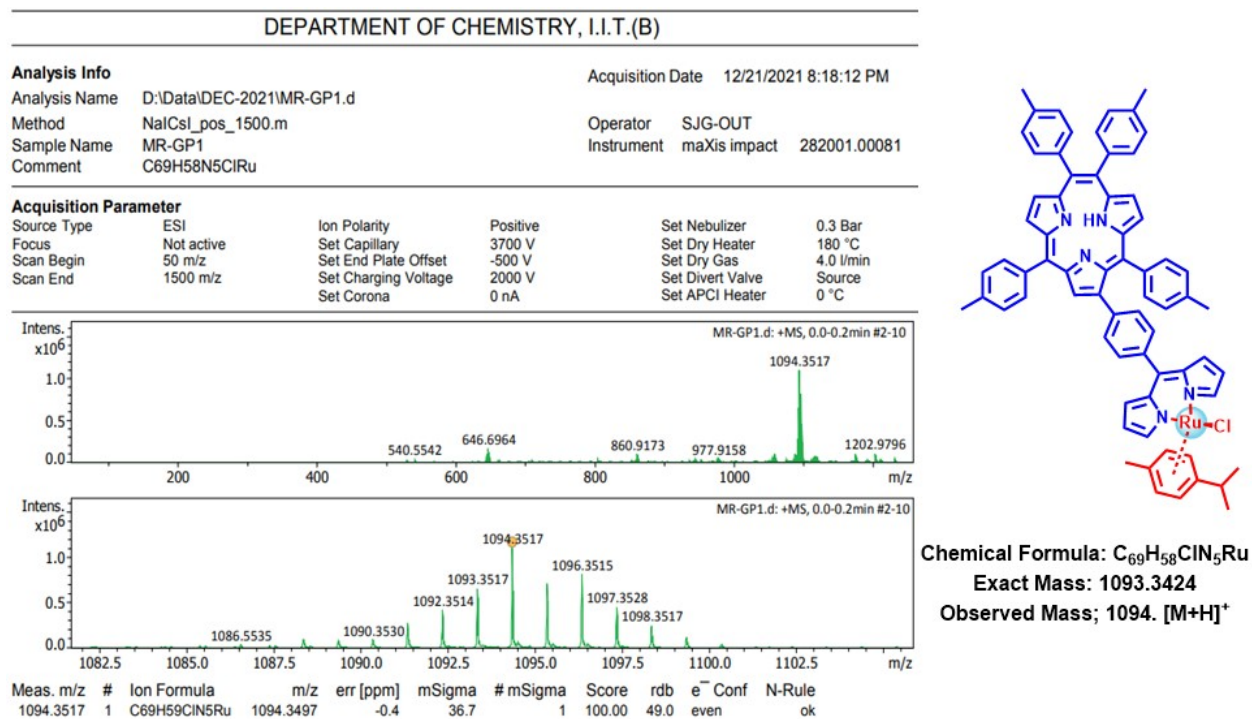

Figure S13. HR mass spectrum of the compound 7.

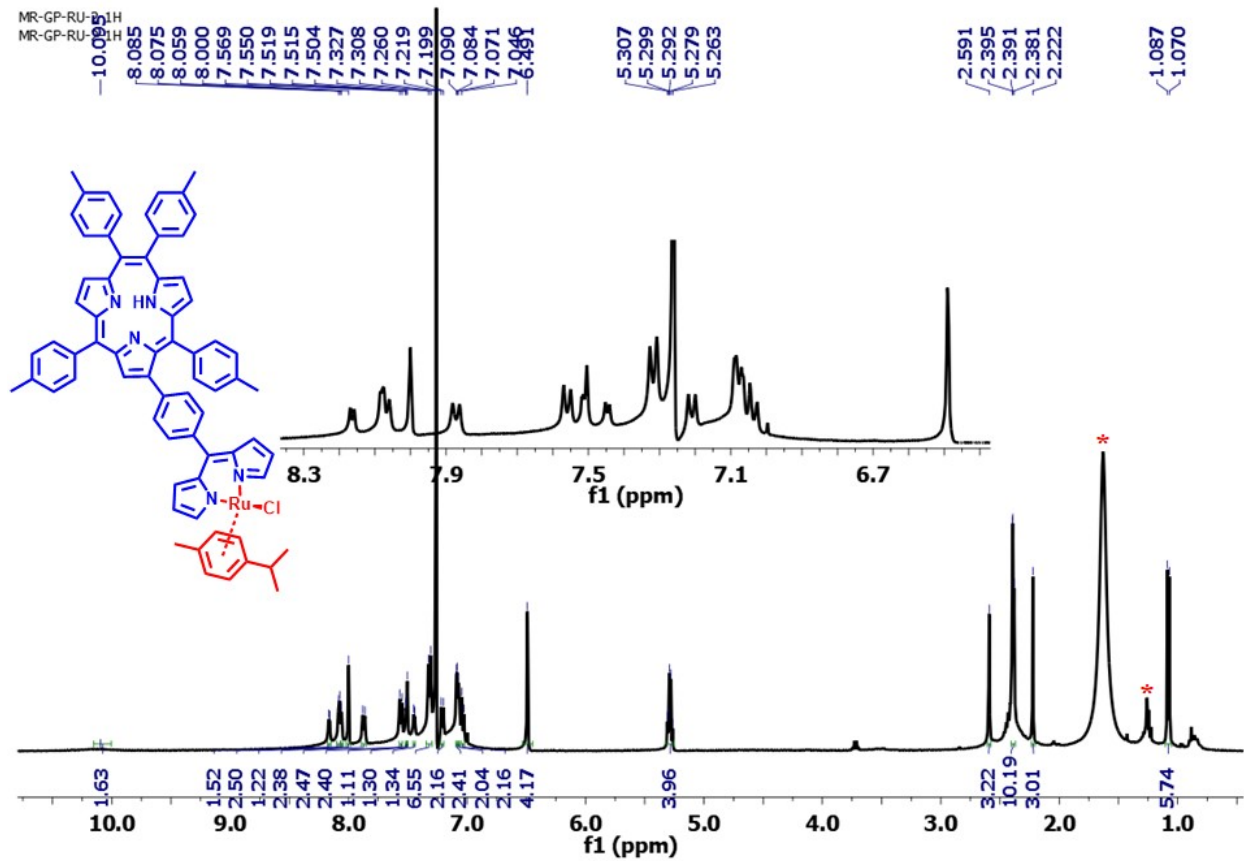

**Figure S14.** <sup>1</sup>H NMR spectrum of the compound 7 recorded in CDCl<sub>3</sub> in 400 MHz instrument. Note: Peaks marked with asterisk (\*) are due to residual solvents.

## DEPARTMENT OF CHEMISTRY, I.I.T.(B)

## Analysis Info

Analysis Name D:\Data\NOV-2021\MR-GP-PD.d  
 Method NaICsl\_pos\_1500.m  
 Sample Name MR-GP-PD  
 Comment C64H51N5O2Pd

Acquisition Date 11/23/2021 8:55:22 PM

Operator SJG-IN  
 Instrument maXis impact 282001.00081

## Acquisition Parameter

|             |            |                      |          |                  |           |
|-------------|------------|----------------------|----------|------------------|-----------|
| Source Type | ESI        | Ion Polarity         | Positive | Set Nebulizer    | 0.3 Bar   |
| Focus       | Not active | Set Capillary        | 3700 V   | Set Dry Heater   | 180 °C    |
| Scan Begin  | 50 m/z     | Set End Plate Offset | -500 V   | Set Dry Gas      | 4.0 l/min |
| Scan End    | 1500 m/z   | Set Charging Voltage | 2000 V   | Set Divert Valve | Source    |
|             |            | Set Corona           | 0 nA     | Set APCI Heater  | 0 °C      |

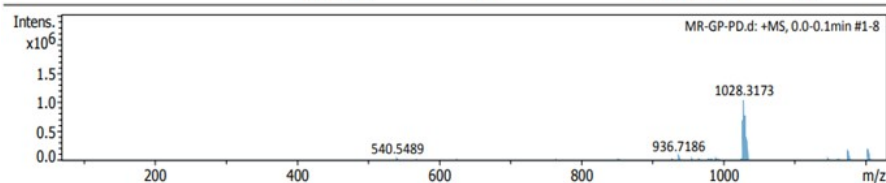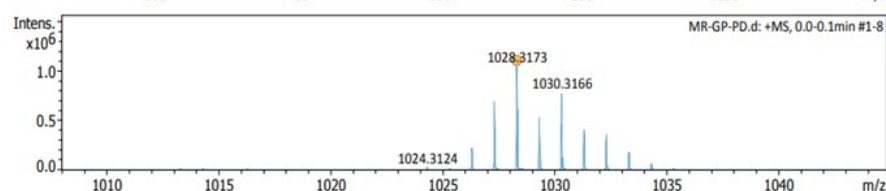

| Meas. m/z | # | Ion Formula  | m/z       | err [ppm] | mSigma | # mSigma | Score  | rdb  | e <sup>-</sup> Conf | N-Rule |
|-----------|---|--------------|-----------|-----------|--------|----------|--------|------|---------------------|--------|
| 1028.3173 | 1 | C64H52N5O2Pd | 1028.3150 | -0.1      | 37.9   | 1        | 100.00 | 43.0 | even                | ok     |

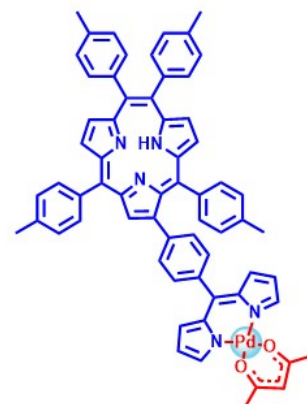

Chemical Formula: C<sub>64</sub>H<sub>51</sub>N<sub>5</sub>O<sub>2</sub>Pd  
 Exact Mass: 1027.3078  
 Observed Mass: 1028. [M+H]<sup>+</sup>

Figure S15. HR mass spectrum of the compound 8.

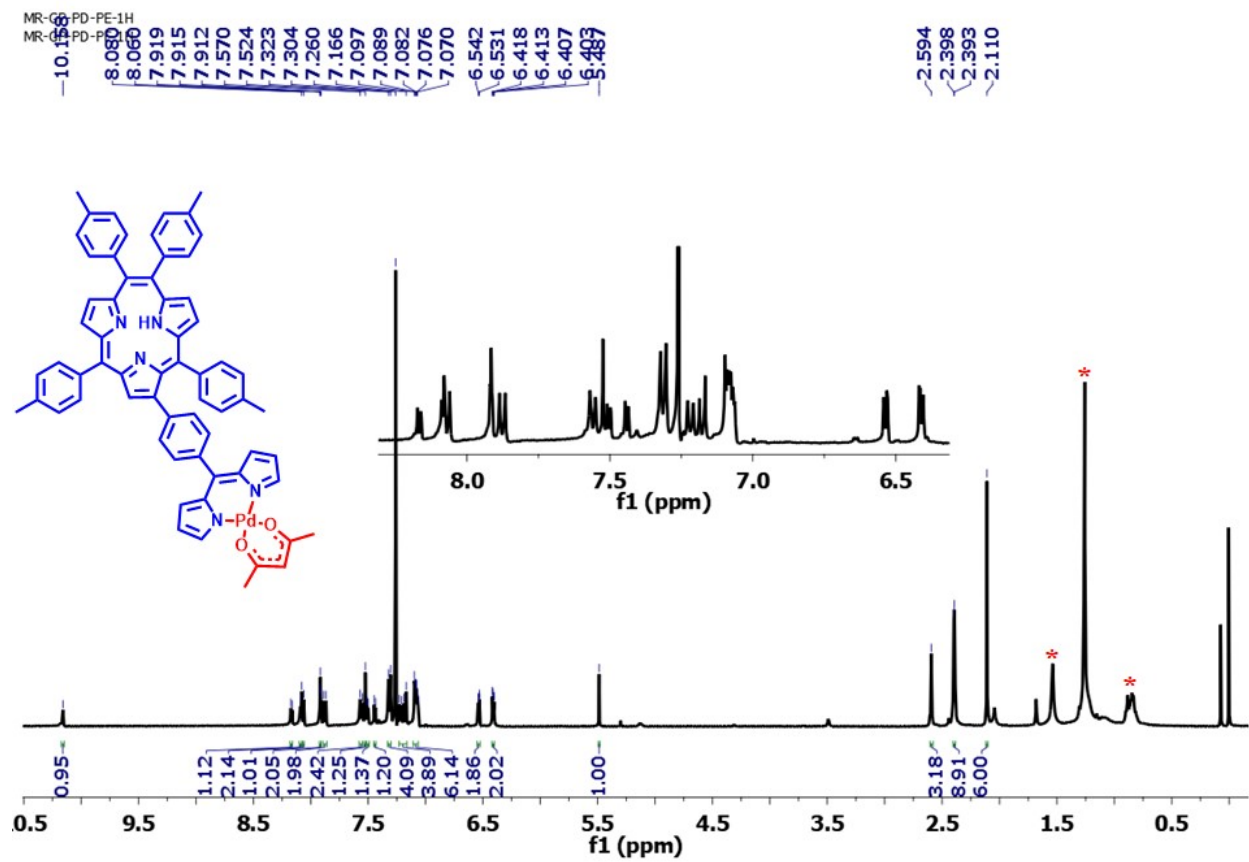

**Figure S16.**  $^1\text{H}$  NMR spectrum of the compound **8** recorded in  $\text{CDCl}_3$  in 400 MHz instrument. Note: Peaks marked with asterisk (\*) are due to residual solvents.



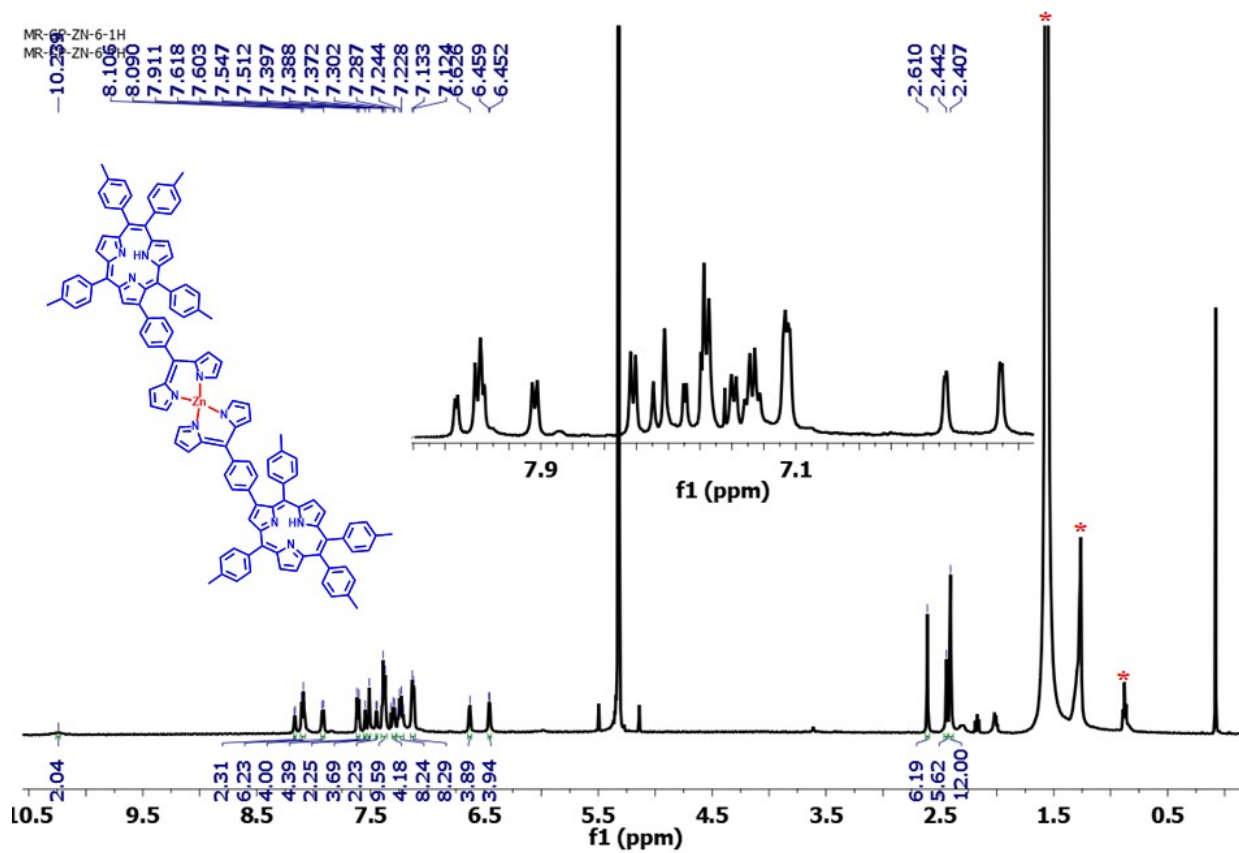

**Figure S17.**  $^1\text{H}$  NMR spectrum of the compound **9** recorded in  $\text{CD}_2\text{Cl}_2$  in 500 MHz instrument.  
Note: Peaks marked with asterisk (\*) are due to residual solvents.

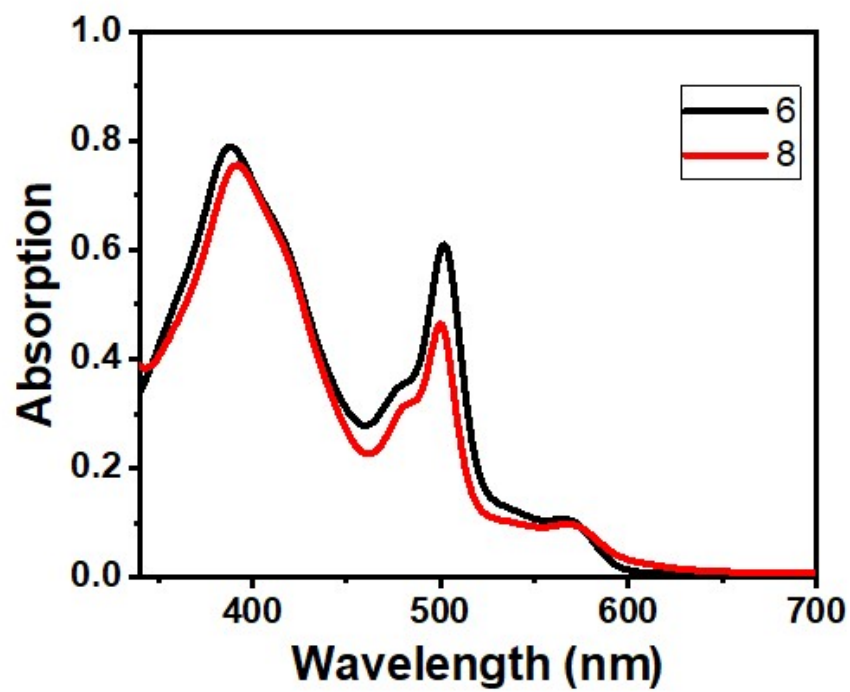

**Figure S18.** Comparison of absorption spectra of compounds **6** and **8** ( $1 \times 10^{-5}$  M) recorded in CHCl<sub>3</sub>.

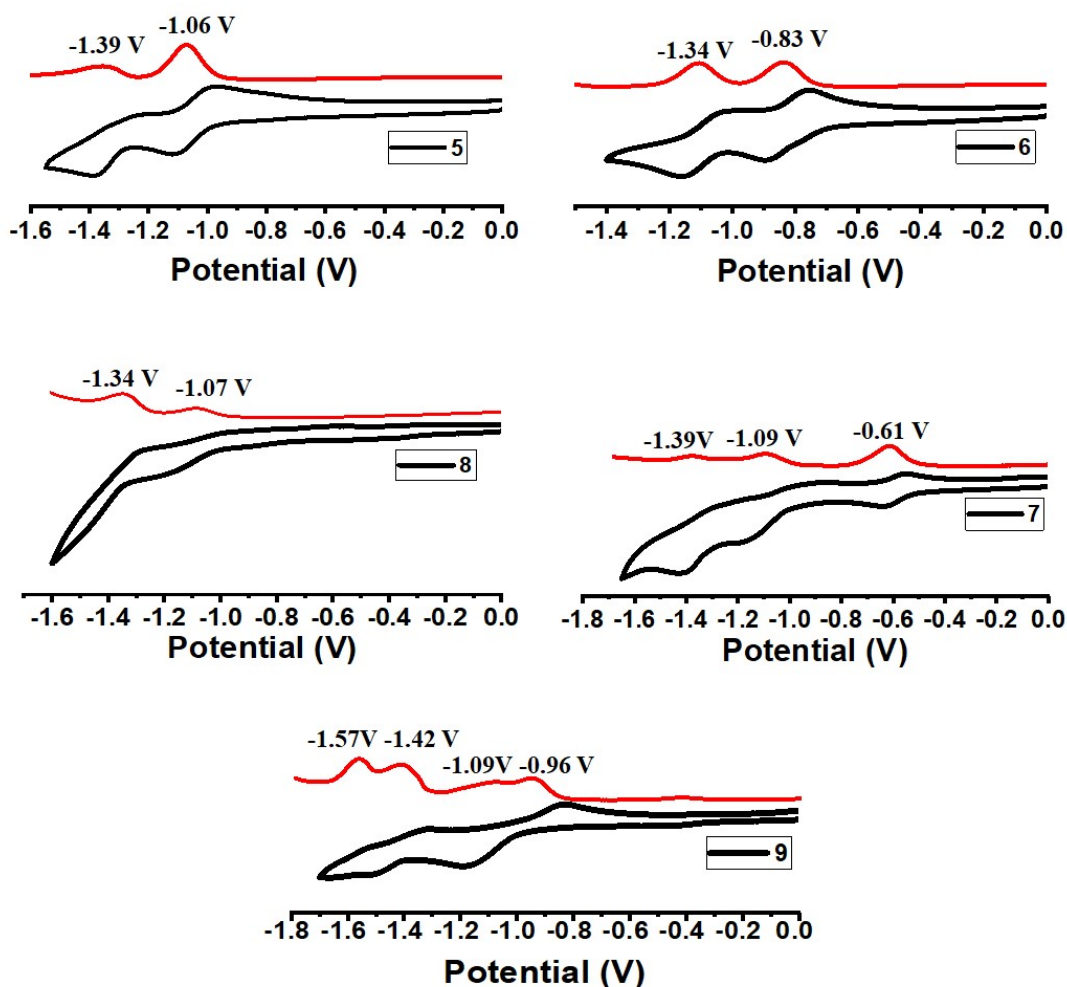

**Figure S19.** Reduction waves of the Cyclic Voltammogram (black line) along with differential pulse voltammogram (red line) of compound **5**, **6**, **7**, **8** and **9** recorded in dry dichloromethane with 0.1M TBAP as supporting electrolyte and saturated calomel electrode (SCE) as the reference electrode at a scan rate of 50 mV/s.

**Table S1.** S<sub>0</sub> optimized geometry of the compound **5** at B3LYP/6-31g (d,p) level of theory

# Sum of imaginary frequencies = 0

# Total Energy (hartree) = -2549.180243

| Atom | X       | V       | Z       | Atom | X       | Y       | Z       |
|------|---------|---------|---------|------|---------|---------|---------|
| C    | 0.668   | 0.08557 | 0.89629 | C    | 3.46858 | -3.0193 | 2.3931  |
| C    | 1.84833 | 0.92805 | 0.58232 | C    | 3.62896 | -4.1567 | 1.58706 |
| C    | 1.36259 | 2.21481 | 0.53746 | C    | 2.73731 | -4.3345 | 0.52159 |
| C    | -0.0703 | 2.13911 | 0.78454 | C    | 1.71063 | -3.424  | 0.27904 |
| N    | -0.4098 | 0.87187 | 1.05874 | H    | 2.33833 | -1.2367 | 2.79562 |
| H    | 1.92218 | 3.09549 | 0.25221 | H    | 4.14897 | -2.8537 | 3.22459 |
| C    | -1.0948 | 3.11372 | 0.57696 | H    | 2.85051 | -5.1964 | -0.131  |
| C    | 0.44069 | -1.325  | 0.88959 | H    | 1.04681 | -3.5754 | -0.5661 |
| C    | -3.09   | -1.7714 | 0.22848 | C    | -1.2752 | 5.42139 | -0.4164 |
| C    | -2.7177 | -3.1439 | 0.47465 | C    | -0.9272 | 6.76906 | -0.4322 |
| C    | -1.3776 | -3.1665 | 0.7753  | C    | -0.0364 | 7.30163 | 0.50917 |
| C    | -0.88   | -1.8175 | 0.6957  | C    | 0.49464 | 6.43268 | 1.47257 |
| N    | -1.9602 | -1.0377 | 0.35507 | C    | 0.15498 | 5.08356 | 1.49242 |
| H    | -3.3886 | -3.988  | 0.44294 | C    | -0.7435 | 4.54805 | 0.55027 |
| H    | -0.7904 | -4.0319 | 1.0432  | H    | -1.9472 | 5.02907 | -1.1724 |
| C    | -4.4027 | -1.2564 | -0.0659 | H    | -1.3485 | 7.41857 | -1.1955 |
| C    | -4.848  | 0.0779  | -0.1513 | H    | 1.17858 | 6.8211  | 2.2232  |
| C    | -2.4304 | 2.69085 | 0.35214 | H    | 0.56386 | 4.43497 | 2.26063 |
| C    | -3.6484 | 3.49011 | 0.41309 | C    | 4.30888 | 1.22235 | 0.8763  |
| C    | -4.6907 | 2.63266 | 0.21945 | C    | 3.23828 | 0.56059 | 0.25161 |
| C    | -4.1072 | 1.3046  | 0.0262  | C    | 3.54323 | -0.3943 | -0.7335 |
| N    | -2.7702 | 1.39175 | 0.09527 | C    | 5.93077 | -0.0207 | -0.4428 |
| H    | -1.993  | 0.02214 | 0.28185 | C    | 5.62868 | 0.94017 | 0.53619 |
| H    | -3.7016 | 4.54683 | 0.63367 | H    | 4.09688 | 1.95369 | 1.65035 |
| H    | -5.7446 | 2.86846 | 0.23153 | H    | 2.73657 | -0.9011 | -1.252  |
| C    | -6.3128 | 0.31295 | -0.4146 | H    | 6.43932 | 1.44868 | 1.04766 |
| C    | -6.729  | 0.86299 | -1.6346 | C    | 0.36242 | 8.75684 | 0.46942 |
| C    | -8.0766 | 1.12396 | -1.8809 | H    | 0.55884 | 9.14584 | 1.47305 |
| C    | -9.0537 | 0.85846 | -0.9144 | H    | -0.4166 | 9.37352 | 0.01185 |
| C    | -8.6323 | 0.32675 | 0.3117  | H    | 1.27801 | 8.89948 | -0.1184 |
| C    | -7.2883 | 0.05566 | 0.55815 | C    | 4.7184  | -5.1614 | 1.8761  |
| H    | -5.9882 | 1.08988 | -2.3959 | H    | 4.50194 | -5.7259 | 2.79126 |

|   |         |         |         |   |         |         |         |
|---|---------|---------|---------|---|---------|---------|---------|
| H | -8.3718 | 1.54643 | -2.8384 | H | 5.68701 | -4.6719 | 2.02206 |
| H | -9.3671 | 0.12507 | 1.08749 | H | 4.82241 | -5.8826 | 1.06092 |
| H | -6.9893 | -0.3518 | 1.51856 | C | 4.8607  | -0.6843 | -1.069  |
| C | -10.516 | 1.11668 | -1.189  | H | 5.06883 | -1.4134 | -1.8451 |
| H | -11.043 | 1.43817 | -0.2851 | C | 7.34071 | -0.3262 | -0.7999 |
| H | -10.65  | 1.88917 | -1.9518 | C | 7.75283 | -1.7007 | -0.744  |
| H | -11.018 | 0.21063 | -1.5508 | C | 7.06786 | -2.8538 | -0.3157 |
| C | -5.9243 | -3.1041 | 0.77357 | N | 9.02244 | -2.1083 | -1.112  |
| C | -5.4165 | -2.3505 | -0.2931 | C | 7.94722 | -3.9423 | -0.4391 |
| C | -5.8428 | -2.6724 | -1.5882 | H | 6.05137 | -2.8787 | 0.04717 |
| C | -6.7527 | -3.7052 | -1.8057 | C | 9.15292 | -3.4412 | -0.9294 |
| C | -7.2695 | -4.4543 | -0.7408 | H | 9.70797 | -1.3951 | -1.3881 |
| C | -6.8352 | -4.1366 | 0.55184 | H | 7.74178 | -4.9764 | -0.2026 |
| H | -5.6003 | -2.8802 | 1.78611 | H | 10.0791 | -3.9504 | -1.1545 |
| H | -5.4547 | -2.1095 | -2.4316 | C | 8.20122 | 0.70532 | -1.1642 |
| H | -7.0635 | -3.9359 | -2.8218 | C | 7.88505 | 2.10418 | -1.374  |
| H | -7.2139 | -4.7046 | 1.39823 | N | 9.56137 | 0.49036 | -1.4457 |
| C | -8.2808 | -5.5507 | -0.9773 | C | 9.04965 | 2.7085  | -1.7656 |
| H | -9.3029 | -5.1517 | -0.99   | H | 6.91037 | 2.55706 | -1.2655 |
| H | -8.1162 | -6.0477 | -1.9382 | C | 10.0448 | 1.66589 | -1.7913 |
| H | -8.239  | -6.3107 | -0.1914 | H | 9.20454 | 3.74905 | -2.0188 |
| C | 1.54194 | -2.2926 | 1.09508 | H | 11.0903 | 1.78151 | -2.0616 |
| C | 2.45075 | -2.1036 | 2.15255 |   |         |         |         |

**Table S2.** S<sub>0</sub> optimized geometry of the compound **6** at B3LYP/6-31g (d,p) level of theory

# Sum of imaginary frequencies = 0

# Total Energy (hartree) = -2773.312036

| Atom | X        | Y        | Z        | Atom | X        | Y        | Z        |
|------|----------|----------|----------|------|----------|----------|----------|
| C    | 0.107401 | 0.176725 | 0.991249 | C    | 3.189447 | -3.93465 | 1.871256 |
| C    | 1.26815  | 1.046795 | 0.683875 | C    | 2.337295 | -4.17415 | 0.785812 |
| C    | 0.748286 | 2.319668 | 0.610278 | C    | 1.284449 | -3.31026 | 0.48825  |
| C    | -0.68524 | 2.206739 | 0.832526 | H    | 1.74976  | -1.03972 | 2.966017 |
| N    | -0.99406 | 0.934401 | 1.121564 | H    | 3.605812 | -2.57385 | 3.491594 |
| H    | 1.287139 | 3.211252 | 0.31883  | H    | 2.500664 | -5.04928 | 0.162057 |
| C    | -1.73268 | 3.148133 | 0.587843 | H    | 0.65157  | -3.50958 | -0.37058 |
| C    | -0.07681 | -1.24098 | 1.005863 | C    | -1.9599  | 5.440238 | -0.43235 |
| C    | -3.57029 | -1.80114 | 0.249562 | C    | -1.65212 | 6.797351 | -0.45327 |
| C    | -3.16512 | -3.15889 | 0.526035 | C    | -0.79814 | 7.364726 | 0.502235 |
| C    | -1.83504 | -3.13771 | 0.867082 | C    | -0.26239 | 6.520669 | 1.484747 |
| C    | -1.37488 | -1.77558 | 0.782272 | C    | -0.56204 | 5.162061 | 1.509958 |
| N    | -2.46708 | -1.03251 | 0.398119 | C    | -1.42355 | 4.591717 | 0.553916 |
| H    | -3.80982 | -4.02276 | 0.486288 | H    | -2.60342 | 5.021285 | -1.19883 |
| H    | -1.23153 | -3.98181 | 1.165102 | H    | -2.07606 | 7.427336 | -1.23132 |
| C    | -4.88863 | -1.32993 | -0.08943 | H    | 0.392631 | 6.936188 | 2.246515 |

|   |          |          |          |   |          |          |          |
|---|----------|----------|----------|---|----------|----------|----------|
| C | -5.37067 | -0.01056 | -0.20273 | H | -0.15177 | 4.533082 | 2.293596 |
| C | -3.04816 | 2.681307 | 0.334942 | C | 3.719039 | 1.415707 | 0.984921 |
| C | -4.29138 | 3.44258  | 0.355589 | C | 2.668675 | 0.707693 | 0.374936 |
| C | -5.30099 | 2.550965 | 0.144849 | C | 3.003668 | -0.2722  | -0.57612 |
| C | -4.67183 | 1.239846 | -0.01855 | C | 5.377979 | 0.154736 | -0.26678 |
| N | -3.34036 | 1.369063 | 0.084225 | C | 5.047383 | 1.150882 | 0.668363 |
| H | -2.52964 | 0.024852 | 0.308672 | H | 3.483668 | 2.16791  | 1.731497 |
| H | -4.38315 | 4.499307 | 0.562949 | H | 2.213067 | -0.80879 | -1.08852 |
| H | -6.36168 | 2.753604 | 0.12723  | H | 5.841017 | 1.691657 | 1.173361 |
| C | -6.83349 | 0.17781  | -0.50977 | C | -0.44327 | 8.831053 | 0.456976 |
| C | -7.23047 | 0.708791 | -1.74457 | H | -0.24225 | 9.225533 | 1.457377 |
| C | -8.57758 | 0.927387 | -2.03112 | H | -1.24753 | 9.424432 | 0.012303 |
| C | -9.57385 | 0.637056 | -1.09149 | H | 0.457608 | 9.000771 | -0.14614 |
| C | -9.17235 | 0.124872 | 0.149401 | C | 4.316792 | -4.87954 | 2.212236 |
| C | -7.82846 | -0.10421 | 0.436073 | H | 4.195618 | -5.29177 | 3.220522 |
| H | -6.47522 | 0.954365 | -2.48567 | H | 5.286752 | -4.37006 | 2.18947  |
| H | -8.85746 | 1.335889 | -2.99916 | H | 4.361279 | -5.71867 | 1.512707 |
| H | -9.92281 | -0.09494 | 0.904909 | C | 4.329059 | -0.54912 | -0.88603 |
| H | -7.54533 | -0.49743 | 1.407199 | H | 4.560397 | -1.2928  | -1.64111 |
| C | -11.0347 | 0.84894  | -1.4104  | C | 6.790982 | -0.14589 | -0.58311 |
| H | -11.6016 | 1.137013 | -0.51977 | C | 7.258317 | -1.47491 | -0.54836 |
| H | -11.1712 | 1.628624 | -2.16555 | C | 6.597035 | -2.69009 | -0.22479 |
| H | -11.4924 | -0.06792 | -1.80278 | N | 8.584353 | -1.77854 | -0.85118 |
| C | -6.37712 | -3.2158  | 0.72462  | C | 7.530202 | -3.71169 | -0.35558 |
| C | -5.86162 | -2.45663 | -0.33438 | H | 5.562011 | -2.7807  | 0.069507 |
| C | -6.23913 | -2.80356 | -1.63818 | C | 8.743    | -3.10561 | -0.73645 |
| C | -7.10988 | -3.86606 | -1.87177 | H | 7.374092 | -4.76912 | -0.19706 |
| C | -7.63472 | -4.62095 | -0.81487 | H | 9.707521 | -3.55949 | -0.91789 |
| C | -7.24885 | -4.27814 | 0.486649 | C | 7.672337 | 0.895154 | -0.93332 |
| H | -6.09074 | -2.9726  | 1.744023 | C | 7.433724 | 2.274922 | -1.17551 |
| H | -5.84387 | -2.23653 | -2.47553 | N | 9.015175 | 0.641454 | -1.20526 |
| H | -7.38312 | -4.11576 | -2.89419 | C | 8.638784 | 2.835608 | -1.57855 |
| H | -7.63496 | -4.84973 | 1.32722  | H | 6.477792 | 2.768587 | -1.08445 |
| C | -8.6044  | -5.75031 | -1.07005 | C | 9.586177 | 1.793162 | -1.58789 |
| H | -9.63658 | -5.382   | -1.12439 | H | 8.826727 | 3.863772 | -1.85253 |
| H | -8.39159 | -6.25533 | -2.01724 | H | 10.6327  | 1.821992 | -1.85829 |
| H | -8.56804 | -6.49775 | -0.27202 | B | 9.73713  | -0.74323 | -1.09023 |
| C | 1.048997 | -2.16562 | 1.26778  | F | 10.40418 | -1.02777 | -2.26663 |
| C | 1.916619 | -1.91585 | 2.347703 | F | 10.5967  | -0.74562 | -0.00553 |
| C | 2.959952 | -2.78484 | 2.642977 |   |          |          |          |

**Table S3.**  $S_0$  optimized geometry of the compound **7** at B3LYP/6-31g (d,p) and LANL2DZ level of theory

# Sum of imaginary frequencies = 0

# Total Energy (hartree) = -3492.202984

| Atom | X       | Y       | Z       | Atom | X       | Y       | Z       |
|------|---------|---------|---------|------|---------|---------|---------|
| Ru   | -8.0148 | -0.1195 | -0.649  | C    | 8.4789  | -3.2752 | 0.5447  |
| Cl   | -8.928  | 2.0465  | -0.0188 | H    | 8.7654  | -2.6228 | 1.3634  |
| N    | 4.3276  | -0.9502 | 0.4391  | C    | -7.1873 | -0.3052 | 2.2698  |
| N    | 5.5635  | 1.302   | 0.1802  | H    | -8.2261 | -0.513  | 2.4861  |
| H    | 4.8161  | 0.5657  | 0.338   | C    | 9.1528  | -4.4796 | 0.3538  |
| N    | 3.2452  | 1.2553  | 1.3058  | H    | 9.9601  | -4.751  | 1.0302  |
| N    | -6.5121 | 0.9217  | -1.6383 | C    | -5.4302 | 2.0297  | -3.3041 |
| N    | -6.7992 | 0.0282  | 1.0323  | H    | -5.2793 | 2.5478  | -4.2412 |
| C    | 5.4344  | 2.6646  | 0.3075  | C    | -0.7764 | -3.3334 | 1.5481  |
| C    | 3.229   | -1.5177 | 1.0322  | H    | -1.1085 | -4.2258 | 1.023   |
| C    | 5.3024  | -1.8666 | 0.3851  | C    | 0.3851  | -2.6863 | 1.1294  |
| C    | 3.0712  | 2.5513  | 0.9755  | H    | 0.9374  | -3.0675 | 0.2762  |
| C    | 2.0481  | -0.7992 | 1.3383  | C    | -4.5033 | 1.7927  | -2.3083 |
| C    | 4.0843  | 4.7851  | 0.4475  | H    | -3.4669 | 2.0958  | -2.2842 |
| C    | 0.8312  | -1.5178 | 1.7707  | C    | -6.6534 | 1.4797  | -2.8446 |
| C    | 7.3056  | -0.4032 | -0.3217 | H    | -7.6164 | 1.4924  | -3.3366 |
| C    | 3.5304  | -2.9131 | 1.3353  | C    | -2.2516 | 0.2672  | -0.4479 |
| H    | 2.8712  | -3.6084 | 1.8353  | H    | -2.577  | -0.4778 | -1.1677 |
| C    | 6.8305  | 0.9462  | -0.1388 | C    | 11.3833 | -0.4952 | -1.8268 |
| C    | 4.206   | 3.3208  | 0.6054  | C    | 10.2944 | -0.7985 | -2.656  |
| C    | 6.7344  | 3.2134  | 0.04    | H    | 10.4711 | -1.0558 | -3.6979 |
| H    | 6.9872  | 4.2629  | 0.0779  | C    | -7.8784 | -1.9089 | -2.022  |
| C    | 8.724   | -0.4531 | -0.832  | H    | -7.0225 | -2.1382 | -2.6448 |
| C    | 4.6167  | 5.4664  | -0.6627 | C    | 8.8075  | -5.3487 | -0.6905 |
| H    | 5.1178  | 4.9025  | -1.4427 | C    | -6.0924 | -0.3094 | 3.1673  |
| C    | 1.6514  | 2.827   | 0.8068  | H    | -6.1378 | -0.5351 | 4.224   |
| H    | 1.2071  | 3.764   | 0.4982  | C    | -1.0781 | -1.6889 | 3.2723  |
| C    | -0.4435 | 1.41    | 0.7135  | H    | -1.6381 | -1.2975 | 4.1183  |
| C    | 4.8157  | -3.1323 | 0.9395  | C    | -1.5326 | -2.8465 | 2.6214  |
| H    | 5.3872  | -4.0437 | 1.0384  | C    | -7.9479 | -2.412  | -0.7045 |
| C    | 4.4699  | 6.8449  | -0.7932 | C    | -8.9101 | -1.0646 | -2.5557 |
| H    | 4.8778  | 7.3432  | -1.6692 | H    | -8.8062 | -0.6834 | -3.5658 |
| C    | 3.3911  | 5.5418  | 1.411   | C    | 3.6642  | 9.0982  | 0.0456  |
| H    | 2.9771  | 5.0384  | 2.279   | H    | 3.6734  | 9.4129  | -1.0022 |
| C    | 6.6488  | -1.6254 | -0.0879 | H    | 4.4964  | 9.6094  | 0.5462  |
| C    | 2.0613  | 0.6369  | 1.2505  | H    | 2.7391  | 9.4623  | 0.5025  |
| C    | 7.4266  | -2.8973 | -0.3013 | C    | -9.9954 | -0.6498 | -1.7692 |
| C    | 7.5853  | 2.1693  | -0.2441 | C    | -9.0755 | -1.9999 | 0.0925  |
| H    | 8.6336  | 2.2362  | -0.4901 | H    | -9.1264 | -2.3159 | 1.1292  |
| C    | 7.0653  | -3.7752 | -1.3332 | C    | -6.9224 | -3.3596 | -0.1062 |
| H    | 6.2398  | -3.5135 | -1.9893 | H    | -6.8051 | -3.0621 | 0.9438  |
| C    | 3.7917  | 7.5995  | 0.1741  | C    | -5.5397 | -3.2809 | -0.7665 |
| C    | -1.4069 | 2.1895  | 1.375   | H    | -5.5578 | -3.6575 | -1.7955 |
| H    | -1.0799 | 2.9424  | 2.0864  | H    | -4.8284 | -3.8984 | -0.2098 |

|   |         |         |         |   |         |         |         |
|---|---------|---------|---------|---|---------|---------|---------|
| C | 8.989   | -0.7758 | -2.1706 | H | -5.1616 | -2.2552 | -0.7773 |
| H | 8.1628  | -1.0156 | -2.8333 | C | -7.4685 | -4.8029 | -0.1311 |
| C | 0.0741  | -1.0339 | 2.855   | H | -8.4361 | -4.88   | 0.3752  |
| H | 0.4085  | -0.1418 | 3.3748  | H | -6.7715 | -5.4825 | 0.37    |
| C | 11.1164 | -0.1691 | -0.4921 | H | -7.5997 | -5.1526 | -1.1612 |
| H | 11.9414 | 0.0664  | 0.1761  | C | 9.5678  | -6.6344 | -0.9155 |
| C | 3.252   | 6.92    | 1.2751  | H | 8.964   | -7.3677 | -1.4582 |
| H | 2.7181  | 7.4799  | 2.0391  | H | 9.8801  | -7.0867 | 0.0311  |
| C | -0.8933 | 0.4528  | -0.2116 | H | 10.4766 | -6.4596 | -1.5053 |
| H | -0.1685 | -0.1466 | -0.7527 | C | -2.8068 | -3.5251 | 3.0625  |
| C | -3.212  | 1.0223  | 0.2429  | H | -3.6713 | -2.8645 | 2.9241  |
| C | -5.1834 | 1.1051  | -1.2531 | H | -2.7708 | -3.7891 | 4.1258  |
| C | -2.7686 | 1.9946  | 1.1516  | H | -2.9882 | -4.443  | 2.496   |
| H | -3.4974 | 2.6007  | 1.6808  | C | 12.7945 | -0.5011 | -2.3662 |
| C | -4.6682 | 0.7823  | 0.011   | H | 12.9914 | 0.3889  | -2.977  |
| C | 0.9962  | 1.6264  | 0.9543  | H | 12.9762 | -1.3735 | -3.0027 |
| C | 9.8096  | -0.1443 | -0.002  | H | 13.5317 | -0.5137 | -1.5583 |
| H | 9.6298  | 0.1111  | 1.0388  | C | 10.0502 | -1.1254 | -0.4066 |
| C | -5.4295 | 0.2886  | 1.0864  | H | -0.8356 | -0.7627 | 0.2468  |
| C | 7.749   | -4.9755 | -1.5273 | C | -1.0427 | 0.3018  | -2.2737 |
| H | 7.4508  | -5.6343 | -2.3396 | H | -1.0699 | 1.1894  | -1.6327 |
| C | -4.9822 | 0.0495  | 2.4231  | H | -12.031 | -0.1719 | -2.2578 |
| H | -3.9655 | 0.164   | 2.7686  | H | -0.8304 | 0.6203  | -3.2971 |

**Table S4.**  $S_0$  optimized geometry of the compound **8** at B3LYP/6-31g (d,p) and LANL2DZ level of theory

# Sum of imaginary frequencies = 1

# Total Energy (hartree) = -3020.547334

| Atom | X        | Y        | Z        | Atom | X        | Y        | Z        |
|------|----------|----------|----------|------|----------|----------|----------|
| C    | 7.055117 | -0.1282  | -0.35867 | C    | -5.66394 | -1.07575 | 0.173245 |
| C    | 6.53875  | -1.4333  | -0.22792 | N    | -6.991   | -1.44213 | -0.04771 |
| C    | 7.45924  | -2.5875  | -0.53805 | Pd   | -8.53788 | -0.26283 | -0.60577 |
| C    | 5.227818 | -1.8662  | 0.183796 | O    | -9.79783 | -1.87933 | -0.50727 |
| C    | 6.406937 | 1.141266 | -0.12751 | O    | -10.082  | 0.968818 | -1.15769 |
| C    | 8.50397  | 0.018293 | -0.7445  | C    | -11.2927 | 0.590927 | -1.30764 |
| C    | 7.761988 | -2.92403 | -1.86454 | C    | -11.0499 | -1.83791 | -0.75506 |
| C    | 8.590339 | -4.00581 | -2.15701 | C    | -11.7946 | -0.70855 | -1.13139 |
| C    | 9.142012 | -4.79481 | -1.13866 | C    | -12.2394 | 1.699407 | -1.71899 |
| C    | 8.835782 | -4.45895 | 0.18573  | C    | -11.7529 | -3.17212 | -0.61277 |
| C    | 8.006612 | -3.37667 | 0.482557 | H    | 7.348117 | -2.32802 | -2.67243 |
| C    | 8.850117 | 0.546658 | -1.9958  | H    | 8.811826 | -4.24169 | -3.19533 |
| C    | 10.18669 | 0.720042 | -2.35633 | H    | 9.254066 | -5.04901 | 0.997877 |
| C    | 11.22287 | 0.389635 | -1.47483 | H    | 7.785615 | -3.13623 | 1.51892  |



|   |          |          |          |   |          |          |          |
|---|----------|----------|----------|---|----------|----------|----------|
| C | 10.87353 | -0.1265  | -0.21928 | H | 8.063909 | 0.818377 | -2.69465 |
| C | 9.540303 | -0.31012 | 0.140886 | H | 10.42694 | 1.120673 | -3.33843 |
| N | 4.15993  | -1.06417 | 0.402653 | H | 11.65721 | -0.38919 | 0.487606 |
| C | 3.068813 | -1.7759  | 0.844856 | H | 9.298216 | -0.7114  | 1.119943 |
| C | 3.489395 | -3.15259 | 0.893343 | H | 4.25124  | -0.00756 | 0.316435 |
| C | 4.796375 | -3.21295 | 0.47417  | H | 2.87722  | -3.9799  | 1.219987 |
| C | 7.08375  | 2.431832 | 0.005224 | H | 5.409839 | -4.09643 | 0.390845 |
| C | 6.114812 | 3.35216  | 0.278149 | H | 8.147376 | 2.603184 | -0.07344 |
| C | 4.849991 | 2.628467 | 0.326138 | H | 6.250451 | 4.404711 | 0.483683 |
| N | 5.087737 | 1.309879 | 0.05331  | H | 0.535187 | 3.291995 | 0.576988 |
| C | 3.565535 | 3.133727 | 0.657126 | H | 10.6453  | -5.79031 | -2.33809 |
| C | 1.801996 | -1.20386 | 1.148133 | H | 10.67292 | -6.23757 | -0.62503 |
| C | 2.50573  | 2.223539 | 0.958721 | H | 9.414031 | -6.87201 | -1.68705 |
| C | 1.064056 | 2.382274 | 0.828265 | H | 12.80162 | 0.634128 | -2.93615 |
| C | 0.509417 | 1.126435 | 0.928012 | H | 13.04476 | 1.559763 | -1.453   |
| C | 1.660507 | 0.218295 | 1.154807 | H | 13.31145 | -0.18336 | -1.45038 |
| N | 2.792174 | 0.93997  | 1.218446 | H | 0.094823 | -0.96123 | 3.208899 |
| C | 3.30107  | 4.586743 | 0.646437 | H | -1.7714  | -2.44567 | 3.832672 |
| C | 0.666457 | -2.09703 | 1.468899 | H | -0.93184 | -4.92841 | 0.430693 |
| C | 10.01698 | -5.98289 | -1.46275 | H | 0.927565 | -3.43863 | -0.19944 |
| C | 12.66966 | 0.608059 | -1.85046 | H | 2.11315  | 4.556069 | 2.445361 |
| C | -0.13025 | -1.82972 | 2.598033 | H | 1.633701 | 6.97421  | 2.431316 |
| C | -1.17996 | -2.67117 | 2.948618 | H | 3.929127 | 7.408162 | -1.17154 |
| C | -1.48498 | -3.80954 | 2.18618  | H | 4.388675 | 4.987878 | -1.17202 |
| C | -0.70478 | -4.06499 | 1.050968 | H | -3.52178 | -4.17673 | 2.8221   |
| C | 0.353299 | -3.22933 | 0.697566 | H | -2.8378  | -5.45526 | 1.804335 |
| C | 2.506904 | 5.17781  | 1.647423 | H | -2.34273 | -5.30244 | 3.493705 |
| C | 2.243638 | 6.544616 | 1.640241 | H | 1.535293 | 9.098847 | 1.122957 |
| C | 2.755356 | 7.377934 | 0.635732 | H | 2.477649 | 9.27633  | -0.36668 |
| C | 3.536682 | 6.78913  | -0.36833 | H | 3.272029 | 9.399405 | 1.203679 |
| C | 3.80669  | 5.423483 | -0.36642 | H | -0.62345 | -0.6676  | -0.8044  |
| C | -2.60727 | -4.73408 | 2.593496 | H | -3.0231  | -1.0348  | -1.22085 |
| C | 2.492109 | 8.864413 | 0.646884 | H | -3.99406 | 1.94451  | 1.715709 |
| C | -0.92136 | 0.838681 | 0.71019  | H | -1.5869  | 2.296739 | 2.148537 |
| C | -1.35652 | -0.10458 | -0.23655 | H | -8.65262 | 2.733556 | -1.38598 |
| C | -2.71168 | -0.31154 | -0.47386 | H | -8.07768 | -3.22597 | 0.174514 |
| C | -3.68724 | 0.425376 | 0.218523 | H | -4.37902 | 2.942614 | -0.73492 |
| C | -3.25677 | 1.373425 | 1.160296 | H | -6.50504 | 4.415171 | -1.51559 |
| C | -1.9001  | 1.572021 | 1.402759 | H | -5.70868 | -4.28726 | 1.020166 |
| C | -5.14085 | 0.213246 | -0.03996 | H | -3.92694 | -2.25514 | 0.934296 |
| C | -7.62163 | 2.525247 | -1.1395  | H | -12.8539 | -0.85345 | -1.30226 |
| C | -7.11845 | -2.73753 | 0.267007 | H | -12.208  | 2.498012 | -0.97085 |
| N | -7.26506 | 1.305651 | -0.71705 | H | -11.9015 | 2.130745 | -2.66688 |
| C | -5.8912  | 1.318939 | -0.47963 | H | -13.2679 | 1.351773 | -1.83017 |
| C | -5.41007 | 2.627869 | -0.79508 | H | -11.6137 | -3.54791 | 0.406082 |
| C | -6.49756 | 3.380766 | -1.20043 | H | -12.8207 | -3.10742 | -0.82826 |

|   |          |          |          |   |          |          |          |
|---|----------|----------|----------|---|----------|----------|----------|
| C | -5.88368 | -3.26718 | 0.706693 | H | -11.2923 | -3.89785 | -1.29096 |
| C | -4.97075 | -2.22751 | 0.658672 |   |          |          |          |

**Table S5.**  $S_0$  optimized geometry of the compound **9** at B3LYP/6-31g (d,p) and LANL2DZ level of theory

# Total Energy (hartree) = -5162.521603

| Atom | X        | Y        | Z        | Atom | X        | Y        | Z        |
|------|----------|----------|----------|------|----------|----------|----------|
| C    | 10.34134 | -0.28142 | -0.80079 | C    | -9.15497 | -1.0547  | -0.36816 |
| C    | 9.221735 | 0.564007 | -1.28949 | C    | -9.8214  | -2.22252 | -0.67855 |
| C    | 9.807731 | 1.735128 | -1.72613 | C    | -11.2416 | -1.93423 | -0.64864 |
| C    | 11.23693 | 1.617241 | -1.51709 | N    | -11.4063 | -0.64621 | -0.24288 |
| N    | 11.48203 | 0.40565  | -0.94807 | H    | -9.3582  | -3.13755 | -1.02587 |
| H    | 9.282795 | 2.578173 | -2.15659 | C    | -12.4479 | -2.60038 | -0.98232 |
| C    | 12.38799 | 2.419283 | -1.71537 | C    | -10.2031 | 1.309259 | 0.37462  |
| C    | 10.44407 | -1.60355 | -0.23981 | C    | -13.6813 | 2.350824 | 0.541776 |
| C    | 13.89837 | -1.99196 | 0.833152 | C    | -13.031  | 3.616154 | 0.803548 |
| C    | 13.43164 | -3.35009 | 0.989358 | C    | -11.6708 | 3.415293 | 0.815005 |
| C    | 12.10015 | -3.39554 | 0.650886 | C    | -11.4201 | 2.026105 | 0.522435 |
| C    | 11.68373 | -2.06732 | 0.274897 | N    | -12.6622 | 1.455355 | 0.387246 |
| N    | 12.79959 | -1.28004 | 0.435854 | H    | -13.5453 | 4.553409 | 0.956471 |
| H    | 14.05194 | -4.18275 | 1.287337 | H    | -10.9088 | 4.159913 | 0.99388  |
| H    | 11.46806 | -4.27157 | 0.628587 | C    | -15.0741 | 2.020086 | 0.558903 |
| C    | 15.1883  | -1.43308 | 1.094573 | C    | -15.5599 | 0.724574 | 0.200155 |
| C    | 15.53977 | -0.11309 | 0.665017 | C    | -13.4775 | -1.61787 | -1.31381 |
| C    | 13.59632 | 1.597674 | -1.66597 | C    | -13.2418 | -0.51173 | -2.24385 |
| C    | 13.75281 | 0.351009 | -2.41397 | C    | -14.137  | 0.455706 | -1.9099  |
| C    | 14.65211 | -0.3927  | -1.71623 | C    | -14.86   | -0.06196 | -0.76787 |
| C    | 14.99219 | 0.397905 | -0.55101 | N    | -14.5382 | -1.38203 | -0.51795 |
| N    | 14.44189 | 1.663614 | -0.61985 | H    | -12.6884 | 0.45008  | 0.172308 |
| H    | 12.75207 | -0.32179 | 0.075983 | H    | -12.4952 | -0.50145 | -3.02808 |
| H    | 13.23626 | 0.101244 | -3.33209 | H    | -14.2691 | 1.434635 | -2.35188 |
| H    | 15.02325 | -1.38476 | -1.93801 | C    | -16.7148 | 0.106908 | 0.889691 |
| C    | 16.37495 | 0.780863 | 1.4947   | C    | -16.97   | 0.309486 | 2.258682 |
| C    | 16.33685 | 0.746972 | 2.901863 | C    | -18.0413 | -0.3149  | 2.888029 |
| C    | 17.1069  | 1.620282 | 3.661011 | C    | -18.9068 | -1.16303 | 2.181398 |
| C    | 17.95106 | 2.562269 | 3.053212 | C    | -18.6484 | -1.37511 | 0.820651 |
| C    | 17.98283 | 2.605172 | 1.653354 | C    | -17.5742 | -0.75764 | 0.187191 |
| C    | 17.21049 | 1.736427 | 0.887899 | H    | -16.3073 | 0.943673 | 2.837533 |
| H    | 15.67954 | 0.042809 | 3.400836 | H    | -18.2048 | -0.14996 | 3.950855 |
| H    | 17.04624 | 1.578808 | 4.746493 | H    | -19.2975 | -2.03531 | 0.249525 |

|   |          |          |          |   |          |          |          |
|---|----------|----------|----------|---|----------|----------|----------|
| H | 18.62212 | 3.330822 | 1.155336 | H | -17.3917 | -0.9408  | -0.86684 |
| H | 17.24982 | 1.791315 | -0.195   | C | -20.0898 | -1.81007 | 2.861535 |
| C | 18.80922 | 3.485504 | 3.884859 | H | -20.3642 | -2.75332 | 2.377239 |
| H | 19.10982 | 4.372906 | 3.318111 | H | -19.8815 | -2.01778 | 3.916809 |
| H | 18.28172 | 3.820228 | 4.785214 | H | -20.9736 | -1.15802 | 2.828273 |
| H | 19.72783 | 2.983021 | 4.217728 | C | -17.2013 | 3.328701 | 0.36571  |
| C | 17.49134 | -2.31931 | 1.529539 | C | -16.0167 | 3.053772 | 1.073048 |
| C | 16.13757 | -2.23893 | 1.908132 | C | -15.7779 | 3.787803 | 2.247932 |
| C | 15.74166 | -2.95272 | 3.05293  | C | -16.6783 | 4.757923 | 2.68682  |
| C | 16.6561  | -3.71574 | 3.778506 | C | -17.8509 | 5.037182 | 1.973989 |
| C | 18.00085 | -3.79522 | 3.397523 | C | -18.096  | 4.298385 | 0.807149 |
| C | 18.3991  | -3.08119 | 2.256916 | H | -17.4137 | 2.772806 | -0.543   |
| H | 17.8235  | -1.78346 | 0.645088 | H | -14.8911 | 3.577073 | 2.838752 |
| H | 14.71079 | -2.89244 | 3.389707 | H | -16.47   | 5.299824 | 3.606914 |
| H | 16.31888 | -4.2516  | 4.66319  | H | -19.0014 | 4.487932 | 0.234324 |
| H | 19.4361  | -3.12917 | 1.931128 | C | -18.8123 | 6.108232 | 2.432498 |
| C | 18.99819 | -4.60131 | 4.195842 | H | -19.854  | 5.807806 | 2.272555 |
| H | 19.64405 | -3.95035 | 4.800254 | H | -18.6845 | 6.333208 | 3.496462 |
| H | 18.49789 | -5.29413 | 4.880216 | H | -18.6586 | 7.04482  | 1.879423 |
| H | 19.65531 | -5.18692 | 3.542356 | C | -8.93744 | 2.015188 | 0.715794 |
| C | 9.320506 | -2.57153 | -0.28192 | C | -8.52595 | 3.169445 | 0.032975 |
| C | 8.659934 | -2.85042 | -1.4903  | C | -7.33812 | 3.818582 | 0.374832 |
| C | 7.646088 | -3.80378 | -1.54847 | C | -6.52527 | 3.346632 | 1.411789 |
| C | 7.245877 | -4.51162 | -0.40618 | C | -6.94709 | 2.199951 | 2.102163 |
| C | 7.892974 | -4.22128 | 0.803089 | C | -8.12539 | 1.543284 | 1.761175 |
| C | 8.913499 | -3.2748  | 0.865997 | H | -9.12847 | 3.546796 | -0.78894 |
| H | 8.958819 | -2.32596 | -2.39282 | H | -7.0347  | 4.702674 | -0.18156 |
| H | 7.161198 | -4.00795 | -2.50042 | H | -6.34167 | 1.817131 | 2.921154 |
| H | 7.591843 | -4.74209 | 1.709496 | H | -8.42919 | 0.656833 | 2.31031  |
| H | 9.392226 | -3.06034 | 1.817409 | C | -13.8249 | -4.60458 | -1.48502 |
| C | 13.54989 | 4.534676 | -2.28858 | C | -14.069  | -5.9692  | -1.39496 |
| C | 13.59532 | 5.921877 | -2.36531 | C | -13.1981 | -6.81982 | -0.69715 |
| C | 12.51615 | 6.709055 | -1.93872 | C | -12.0725 | -6.24793 | -0.08345 |
| C | 11.38757 | 6.052281 | -1.42136 | C | -11.8276 | -4.8823  | -0.15506 |
| C | 11.33773 | 4.667583 | -1.32941 | C | -12.6944 | -4.02619 | -0.86913 |
| C | 12.41657 | 3.871113 | -1.77362 | H | -14.5022 | -3.96619 | -2.0433  |
| H | 14.38971 | 3.942877 | -2.63877 | H | -14.9467 | -6.38776 | -1.88253 |
| H | 14.48071 | 6.405553 | -2.77153 | H | -11.3884 | -6.8843  | 0.473763 |
| H | 10.5432  | 6.64071  | -1.06876 | H | -10.9741 | -4.46071 | 0.366358 |
| H | 10.47295 | 4.190771 | -0.88001 | C | -7.11109 | 0.110653 | -1.25205 |
| C | 6.976142 | 0.677459 | -2.38314 | C | -7.68972 | -0.89154 | -0.45508 |
| C | 7.762605 | 0.343032 | -1.26681 | C | -6.83083 | -1.78255 | 0.20946  |
| C | 7.10219  | -0.11317 | -0.11287 | C | -4.87422 | -0.65488 | -0.68829 |
| C | 4.932364 | 0.116206 | -1.19068 | C | -5.72943 | 0.222364 | -1.37331 |
| C | 5.587887 | 0.572572 | -2.3451  | H | -7.75269 | 0.804687 | -1.7853  |
| H | 7.46446  | 1.014221 | -3.29344 | H | -7.25774 | -2.56661 | 0.828872 |

|   |          |          |          |    |          |          |          |
|---|----------|----------|----------|----|----------|----------|----------|
| H | 7.680782 | -0.36053 | 0.771265 | H  | -5.30337 | 1.00369  | -1.99571 |
| H | 5.002297 | 0.834045 | -3.22147 | C  | -13.4813 | -8.29791 | -0.58057 |
| C | 12.57424 | 8.216128 | -2.00069 | H  | -12.558  | -8.87723 | -0.47293 |
| H | 11.61002 | 8.644068 | -2.29779 | H  | -14.0192 | -8.67361 | -1.45767 |
| H | 13.33255 | 8.559318 | -2.71192 | H  | -14.1045 | -8.51319 | 0.298344 |
| H | 12.82755 | 8.64284  | -1.02059 | C  | -5.23453 | 4.038633 | 1.782798 |
| C | 6.174311 | -5.57416 | -0.47989 | H  | -5.28198 | 4.455462 | 2.797204 |
| H | 6.614645 | -6.57435 | -0.59151 | H  | -5.01055 | 4.861263 | 1.096316 |
| H | 5.508974 | -5.41374 | -1.33452 | H  | -4.38927 | 3.339877 | 1.760415 |
| H | 5.562449 | -5.58985 | 0.42881  | C  | -5.44633 | -1.66029 | 0.104689 |
| C | 5.716073 | -0.23136 | -0.07793 | H  | -4.79991 | -2.35101 | 0.638469 |
| H | 5.228412 | -0.57563 | 0.829102 | C  | -3.38794 | -0.51111 | -0.79272 |
| C | 3.441218 | 0.011935 | -1.14451 | C  | -2.71608 | -0.11623 | 0.385796 |
| C | 2.904251 | -1.2778  | -0.93003 | C  | -3.32491 | 0.242372 | 1.629596 |
| C | 3.638185 | -2.50332 | -0.84511 | N  | -1.33105 | 0.026558 | 0.51841  |
| N | 1.543478 | -1.5723  | -0.78858 | C  | -2.30598 | 0.592021 | 2.500671 |
| C | 2.719545 | -3.51976 | -0.64444 | H  | -4.38726 | 0.246193 | 1.827183 |
| H | 4.710641 | -2.60075 | -0.93432 | C  | -1.1031  | 0.442573 | 1.771559 |
| C | 1.449936 | -2.89784 | -0.61818 | H  | -2.39573 | 0.914521 | 3.529671 |
| H | 2.916992 | -4.57776 | -0.53361 | H  | -0.09147 | 0.625554 | 2.116937 |
| H | 0.482711 | -3.37014 | -0.48486 | C  | -2.81593 | -0.77514 | -2.05543 |
| C | 2.721421 | 1.21643  | -1.31937 | C  | -3.50602 | -1.2309  | -3.22318 |
| C | 3.274477 | 2.530937 | -1.43769 | N  | -1.45764 | -0.64998 | -2.37016 |
| N | 1.327159 | 1.32326  | -1.37916 | C  | -2.56642 | -1.36716 | -4.22998 |
| C | 2.217049 | 3.413168 | -1.57894 | H  | -4.5654  | -1.43452 | -3.28515 |
| H | 4.326453 | 2.774234 | -1.40508 | C  | -1.32615 | -1.00062 | -3.65639 |
| C | 1.044853 | 2.624024 | -1.53597 | H  | -2.73077 | -1.69128 | -5.24908 |
| H | 2.263313 | 4.488174 | -1.69261 | H  | -0.35335 | -0.98499 | -4.13576 |
| H | 0.016288 | 2.960165 | -1.61003 | Zn | 0.019994 | -0.2151  | -1.01155 |
| C | -10.2113 | -0.05931 | -0.05778 |    |          |          |          |

**Table S6:** Comparison of energy levels using B3LYP/LANL2DZ and def2-TZVP basis sets.

| Compound | B3LYP/LANL2DZ          |                        |         | def2-TZVP              |                        |         |
|----------|------------------------|------------------------|---------|------------------------|------------------------|---------|
|          | E <sub>HOMO</sub> (eV) | E <sub>LUMO</sub> (eV) | ΔE (eV) | E <sub>HOMO</sub> (eV) | E <sub>LUMO</sub> (eV) | ΔE (eV) |
| 7        | -5.1040                | -2.3584                | 2.74    | -5.3936                | -2.6669                | 2.72    |
| 8        | -5.1928                | -2.3865                | 2.80    | -5.4981                | -2.6923                | 2.80    |
| 9        | -4.7760                | -2.4640                | 2.31    | -5.0711                | -2.7826                | 2.28    |
